1

2

3                   **Chemical Inhibitors of DksA1, a Conserved Bacterial**  
4 **Transcriptional Regulator, Suppressed Quorum Sensing-**  
5 **Mediated Virulence in *Pseudomonas aeruginosa***

6

7                   Kyung Bae Min<sup>1,2</sup>, Wontae Hwang<sup>1,2</sup>, Kang-Mu Lee<sup>1</sup> and Sang Sun Yoon<sup>1,2,3#</sup>

8

9                   <sup>1</sup>Department of Microbiology and Immunology, <sup>2</sup>Brain Korea 21 PLUS Project for Medical  
10 Sciences, <sup>3</sup>Institute for Immunology and Immunological Diseases, Yonsei University College  
11 of Medicine, Seoul, Republic of Korea

12

13 #Corresponding author  
14 Sang Sun Yoon, Ph.D.  
15 Department of Microbiology  
16 Yonsei University College of Medicine  
17 250 Seongsanno, Seodaemun-gu  
18 Seoul, 120-752, Korea  
19 Tel: +82-2-2228-1824  
20 Fax: +82-2-392-7088  
21 E-mail: [sangsun\\_yoon@yuhs.ac](mailto:sangsun_yoon@yuhs.ac)

## 1 **Abstract**

2 *Pseudomonas aeruginosa* is a Gram-negative bacterium of clinical importance. As an  
3 opportunistic pathogen, its virulence is dependent on quorum sensing (QS). Stringent  
4 response (SR), a conserved mechanism in the bacterial kingdom, is activated under diverse  
5 stress conditions including nutrient starvation. DksA1, an RNA polymerase-binding  
6 transcriptional regulator, plays a role in *P. aeruginosa* SR. Our recent study clearly  
7 demonstrated that, apart from SR, DksA1 regulates a wide range of phenotypes including  
8 QS-mediated virulence. This suggests that DksA1 is a potential target to be inhibited to  
9 control *P. aeruginosa* infections. Here, we screened a library of 6,970 chemical compounds  
10 and identified two compounds (termed Dkstatin-1 and Dkstatin-2) that specifically suppress  
11 DksA1 activity. Two Dkstatins substantially suppressed production of elastase and pyocyanin  
12 and protected a murine host against lethal infection with PAO1, a prototype strain of *P.*  
13 *aeruginosa*. Dkstatins also suppressed the production of homoserine lactone (HSL)-based  
14 autoinducers that activate *P. aeruginosa* QS. The level of 3-oxo-C12-HSL produced in  
15 Dkstatin-treated cells was almost identical to that in the  $\Delta dksA1$  mutant of PAO1. Our  
16 RNASeq analysis showed that transcript levels of genes involved in QS and virulence were  
17 markedly reduced in Dkstatin-treated PAO1 cells, further demonstrating that Dkstatin-  
18 mediated suppression occurs at the transcriptional level. Importantly, Dkstatins increased  
19 antibiotic susceptibilities of PAO1, particularly to the antibiotics that inhibit protein synthesis.  
20 Our co-immunoprecipitation assay demonstrated that Dkstatins interfere with the binding of  
21 DksA1 to the  $\beta$  subunit of RNA polymerase, which potentially explains the mode of Dkstatin  
22 action. Collectively, our results suggest that the inhibition of *P. aeruginosa* QS, which has  
23 often been attempted, can be achieved by DksA1 inhibitors. Dkstatins will prove to be useful  
24 when establishing infection control strategies.

25

## 1 **Author summary**

2 Bacterial cells developed numerous systems to handle environmental stresses. Stringent  
3 response (SR) is one of those systems, and it is activated under the stress of nutrient  
4 starvation. Active SR requires DksA1, a protein conserved across bacterial species. Besides  
5 this well-recognized function, DksA1 in *P. aeruginosa* positively regulates its virulence by  
6 activating quorum sensing (QS). This finding led us to hypothesize that inhibiting DksA1  
7 would result in virulence attenuation of the pathogenic *P. aeruginosa*. Herein, we identified  
8 two molecules that effectively suppressed DksA1 function through a large-scale compound  
9 library screen. These two compounds suppressed *P. aeruginosa* virulence and therefore  
10 protected a murine host from a deadly infection of *P. aeruginosa*. Moreover, the compounds  
11 also rendered *P. aeruginosa* more susceptible to antibiotics. Our results demonstrate that  
12 dangerous *P. aeruginosa* infections can be controlled by inhibiting DksA1.

## 1 Introduction

2 *Pseudomonas aeruginosa*, an opportunistic human pathogen, has extensive metabolic  
3 capabilities of adapting to diverse environments including immunocompromised human  
4 hosts [1]. In addition, *P. aeruginosa* commonly contains high proportions of regulatory genes,  
5 particularly those for diverse signal pathways that establish resistant phenotypes [1, 2].  
6 Stringent response (SR) is a highly conserved mechanism across bacterial species,  
7 activated in response to nutrient starvation [3]. SR is mediated by two key elements,  
8 nucleotide alarmones called guanosine tetra- and penta-phosphate, (p)ppGpp, and a  
9 transcriptional regulator DksA [4, 5]. DksA is a 17 kDa protein with a coiled-coil N-terminal  
10 domain and globular C-terminal domain consisting of a Zn<sup>2+</sup> binding motif with  $\alpha$ -helix  
11 structures [3, 6]. According to the structural analysis, the Zn<sup>2+</sup> binding motif of DksA consists  
12 of four cysteine residues, which play a key role in sustaining the folding of the C-terminal and  
13 coiled-coil regions of DksA [7]. Under nutrient starvation, a RelA enzyme is introduced to  
14 tRNA for the purpose of sensing amino acid deficiency and initiating the synthesis of  
15 (p)ppGpp via GTP and GDP consumption [5, 8]. Using (p)ppGpp, DksA binds to RNA  
16 polymerase (RNAP) for downstream transcriptional regulation, such as the repression of  
17 rRNA gene transcription [3, 5, 9].

18 The mode of action regarding the interaction of DksA with RNAP was uncovered in a  
19 series of studies using *E. coli*. In *E. coli*, the intracellular level of DksA remains constant  
20 throughout the lifecycle, unlike (p)ppGpp [10]. The constant level of DksA was initially  
21 considered to be crucial as it was identified to suppress *dnaK* mutation with its chaperon  
22 activity [3, 10]. However, DksA was later revealed to be even more significant as it serves as  
23 a transcriptional suppressor of rRNA and ribosomal proteins in *E. coli* [3, 8]. DksA directly  
24 binds to RNAP and modulates RNAP activity by destabilizing the open complex to prevent  
25 intermediate complexation by competition for transcription initiation [3, 4, 11]. A current  
26 model demonstrates that DksA binding requires multiple interactions with (i) rim helices of

1 the  $\beta'$ -subunit, (ii) an active site of the  $\beta$ -subunit and (iii) a  $\beta$ -subunit site insertion 1 ( $\beta$ -SI1) in  
2 a secondary channel of RNAP [11].

3 DksA is also critically involved in regulating bacterial pathogenesis in several pathogens  
4 [10, 12-15]. In *Vibrio cholerae*, DksA upregulated expression of *fliA*, encoding a sigma factor  
5 that regulates its motility. Furthermore, uninterrupted production of cholera toxin and  
6 hemagglutinin protease required functional DksA [16]. Likewise, in *Salmonella*, DksA was  
7 found essential for the expression of motility, biofilm formation, cellular invasion and  
8 intestinal colonization that caused *in vivo* systemic infection [17]. Moreover, DksA in  
9 *Salmonella* controlled central metabolism to balance its redox state, which in turn helped  
10 resist against oxidative stress produced by anti-microbial phagocytes [18].

11 *P. aeruginosa* harbors five genes in its genome encoding proteins belonging to the DksA  
12 superfamily, including two that are highly homologous to the typical DksA in *E. coli* [12, 19].  
13 Of these two DksA homologs, named DksA1 and DksA2, DksA1 is structurally and  
14 functionally similar to *E. coli* DksA. DksA2, on the other hand, was reported to only partially  
15 replace DksA1 functions, as it lacks the typical  $Zn^{2+}$  binding motif present in DksA [19].  
16 However, our recent study clearly suggested that DksA1, not DksA2, plays a dominant role  
17 as a suppressor of ribosomal gene expression [13]. Importantly, a  $\Delta dksA2$  mutant exhibited  
18 almost identical phenotypes with its parental strain, PAO1, indicating that DksA2 can be  
19 dispensable. Beyond its traditional function, DksA1 was also identified to regulate a wide  
20 range of phenotypes including quorum sensing (QS)-related virulence, anaerobiosis and  
21 motilities [13]. Based upon these findings, we hypothesized that DksA1 may be an efficient  
22 target for inhibiting *P. aeruginosa* infection.

23 In the present work, we screened a library of chemical compounds (n=6,970) and  
24 identified two molecules that effectively compromised DksA1 activity. PAO1 cells treated with  
25 each candidate compound shared much of the characteristics of the  $\Delta dksA1$  mutant, such as  
26 significant attenuation of QS-mediated virulence and elevated antibiotic susceptibility. Given

1 that QS machinery has been a target for inhibition, our results demonstrate that DksA1 can  
2 serve as a novel avenue to achieve *P. aeruginosa* QS inhibition.

3

4

## 1 **Results**

### 2 **Screening a library of chemical compounds for DksA1 inhibitors.**

3 To set up a screening scheme in a high-throughput manner, we needed to find a  
4 phenotype of the  $\Delta dksA1$  mutant that can be easily and reproducibly measured. In  
5 *Salmonella*, it was reported that DksA modulates the redox balance in response to oxidative  
6 stress, and the NADH level decreased when the *dksA* gene is disrupted [18]. We therefore  
7 examined whether the phenotype observed in *Salmonella* is also detected in *P. aeruginosa*.  
8 NADH levels are indirectly represented by the conversion of tetrazolium salt to formazan  
9 (purple pigment), which is mediated by a NADH-dependent reductase [20]. In accordance  
10 with what was observed in *Salmonella*, the *P. aeruginosa*  $\Delta dksA1$  mutant produced a  
11 noticeably reduced amount of formazan (S1A Fig). Since the formazan assay can easily be  
12 performed, we concluded that this assay can serve as an efficient screening platform,  
13 minimizing the chance of plate-to-plate variations. The library that we used was a compound  
14 library consisting of a total of 6,970 chemicals that was provided by the Korean Chemical  
15 Bank. The screening was conducted in two stages. To begin with, we screened the entire  
16 library for the formazan assay to isolate candidate compounds. Then, we compared  
17 phenotypes induced in PAO1 by each candidate compound with those of the  $\Delta dksA1$  mutant  
18 (S1B Fig). Our goal was to isolate compounds that make PAO1 behave like the  $\Delta dksA1$   
19 mutant. In the first step, we screened out a total of 178 chemical compounds including 25  
20 compounds that robustly reduced formazan production and 153 mild reducers. In a repetitive  
21 formazan assay using these 153 mild reducers, we selected another set of 25 compounds  
22 that exhibited relatively strong activities in reducing formazan production. Consequently, a  
23 total of 50 compounds were selected in the first stage (S1B Fig).

24 It was previously reported that transcription of genes encoding ribosomal proteins is  
25 highly activated in the  $\Delta dksA1$  mutant [12, 13]. We postulated that these marked changes at

1 the transcriptional levels may allow us to verify the phenotypes induced by candidate  
2 compounds. We therefore constructed a reporter *P. aeruginosa* strain by chromosomally  
3 integrating an *rpsB* gene promoter fused with *lacZ* ORF ( $P_{rpsB}::lacZ$ ). The *rpsB* gene codes  
4 for 30S ribosomal protein S2. In our previous work, we also reported that the production of  
5 elastase, a dominant virulence determinant and an easily measurable phenotype, is highly  
6 suppressed in the  $\Delta dksA1$  mutant [13]. Therefore, we also assessed elastase production as  
7 a second-stage verification. By successive  $\beta$ -galactosidase and elastase activity assays, we  
8 finally nominated a total of 4 chemicals, 55B05, 02G09, 86B09 and 45G08, as a set of final  
9 candidates. We then monitored these two phenotypes in diverse cultivation conditions and at  
10 different time points to finally select chemicals that yield consistent results. While reduced  
11 elastase production and elevated *rpsB* transcription were observed at 4 hour post-  
12 inoculation by all 4 chemicals at a 50  $\mu$ M concentration, the effects of 02G09 and 45G08 did  
13 not last for the extended period of incubation (S2A and S2B Fig). At 8 hour post-inoculation,  
14 the levels of elastase produced in 02G09- or 45G08-treated PAO1 were almost identical to  
15 that of PAO1 (S2B Fig). Thus, 55B05 and 86B09 were finally selected as DksA1 inhibitors  
16 and we referred to these as Dkstatin-1 and Dkstatin-2.

## 17 **Structure and specificity of Dkstatin-1 and Dkstatin-2**

18 The Korean Chemical Bank database provides the structures of Dkstatin-1 and  
19 Dkstatin-2, and they were found to have distinct chemical structures (Fig 1A and 1B). To  
20 further confirm that Dkstatin molecules act specifically against DksA1 activity, formazan  
21 production and *rpsB* reporter expression were measured in PAO1 and the  $\Delta dksA1$  mutant as  
22 well. Hereafter, Dkstatin-1 and -2 were used at 150  $\mu$ M concentrations in all experiments.  
23 Again, levels of formazan production in PAO1 were noticeably reduced in the presence of  
24 Dkstatin treatment (Fig 1C). It is of interest that formazan production in PAO1 treated with  
25 150  $\mu$ M Dkstatin-1 was even lower than that of the  $\Delta dksA1$  mutant. On the other hand, levels



1 of formazan production in the  $\Delta dksA1$  mutant were not further decreased by either Dkstatin  
2 compound (Fig 1C). Likewise, Dkstatin-1 and Dkstatin-2 did not further increase the *rpsB*  
3 gene transcription in the  $\Delta dksA1$  mutant (Fig 1D). As Dkstatin-1 and Dkstatin-2 were  
4 identified to inhibit DksA1 activity, no apparent effects of Dkstatins were present in a strain  
5 devoid of *dksA1* gene. These results suggest that Dkstatin compounds specifically and  
6 selectively inhibit DksA1 activity.

### 7 **Dkstatin compounds interrupt QS-mediated virulence in *P. aeruginosa*.**

8 DksA1 plays versatile roles at the transcriptional level affecting various phenotypes [13].  
9 Therefore, Dkstatin molecules inhibiting the activity of DksA1 may induce diverse  
10 physiological changes in *P. aeruginosa*. To identify whether Dkstatins affect the growth of  
11 PAO1, we conducted growth curve experiments of PAO1 in the presence of 150  $\mu$ M of  
12 Dkstatins. Control growth curves were obtained by adding equal volume of DMSO used as a  
13 solvent. In comparison with PAO1 and  $\Delta dksA1$  mutant, PAO1 growth never changed upon  
14 Dkstatin-1 supplementation (Fig 2A). To our surprise, a noticeable increase in PAO1 growth  
15 was repeatedly observed when treated with Dkstatin-2 (Fig 2A). When CFU was enumerated  
16 8 hour post-inoculation, no obvious growth enhancement was observed (Fig 2B). Together,  
17 these two sets of results indicate that Dkstatin-1 and -2 at least do not down-regulate  
18 bacterial growth and viability.

19 At a concentration of 150  $\mu$ M, Dkstatin-2 suppressed elastase production to a more  
20 significant degree (Fig 2C). Under Dkstatin-2 treated conditions, the level of elastase  
21 production was less than 40% of what control PAO1 cells produced. Elastase production in  
22 PAO1 treated with 150  $\mu$ M Dkstatin-1 was approximately 65% of the control level. Along with  
23 elastase, pyocyanin is another crucial virulence determinant whose production is also  
24 controlled by QS in *P. aeruginosa* [2, 21, 22]. When we measured the pyocyanin production,  
25 a marked reduction was observed in Dkstatin-treated PAO1 (Fig 2D). Interestingly, the

1 degree of reduction by either Dkstatin molecule in PAO1 was comparable to that induced by  
2 the *dksA1* gene deletion (Fig 2D). The loss of pyocyanin production was clearly represented  
3 in the image of culture supernatants shown in Fig 2E.

4 In *P. aeruginosa*, QS is operated by small organic molecules, termed autoinducers [23].  
5 Since major QS-mediated phenotypes were suppressed in Dkstatin-treated PAO1 and in the  
6  $\Delta dksA1$  mutant, we monitored how many autoinducers were produced in response to the  
7 Dkstatin treatment. Two homoserine lactone (HSL) autoinducers, 3-oxo-C12-HSL and C4-  
8 HSL, were semi-quantitatively measured as described in the Methods section. Based on our  
9 quantification, levels of 3-oxo-C12-HSL produced in either Dkstatin-1 or Dkstatin-2 treated  
10 PAO1 cells were almost identical to that in the  $\Delta dksA1$  mutant (Fig 3A). Similarly, levels of  
11 C4-HSL produced upon treatment with either Dkstatin were noticeably decreased to 53%  
12 and 63% of what was detected in the control group, respectively (Fig 3B).

13 When Dkstatin-treated PAO1 cells were co-treated with extraneous C4-HSL and 3-oxo-  
14 C12-HSL, elastase production was restored (S3 Fig). Elastase production was almost  
15 completely recovered following 4 hour autoinducer complementation, while the  
16 complementation effects diminished thereafter (S3 Fig). These results demonstrate that the  
17 LasI-R and RhII-R QS circuits can be substantially impaired by two Dkstatins, with the LasI-  
18 R system being suppressed almost to the degree of the  $\Delta dksA1$  mutant. Furthermore, our  
19 results indicate that Dkstatin-induced virulence attenuation occurred at the level of the HSL-  
20 based autoinducer production.

## 21 **Anaerobic respiration is affected by Dkstatins.**

22 The transcription of genes involved in denitrification or anaerobic respiration requires  
23 DksA1 activity [13]. We therefore examined whether the Dkstatin compounds also have an  
24 impact on anaerobic respiratory growth of *P. aeruginosa*. We tested bacterial growth using  
25  $\text{NO}_3^-$  as an alternative electron acceptor. When cells were grown anaerobically with 25 mM

1 NO<sub>3</sub><sup>-</sup>, PAO1 strains reached an average OD<sub>600</sub> value of ~1.6 in 24 hours (Fig 4A). In contrast,  
2 final OD<sub>600</sub> values plateaued at ~1.24 in the  $\Delta dksA1$  mutant under the same conditions.  
3 Under the Dkstatin-1 supplemented growth conditions, PAO1 grew up to OD<sub>600</sub> values of  
4 ~1.18, similar to the growth of a  $\Delta dksA1$  mutant. Likewise, average OD<sub>600</sub> values were ~1.27  
5 in the presence of Dkstatin-2 (Fig 4A). Interestingly, the growth stimulating effect of Dkstatin-  
6 2 (Fig 2A) observed during aerobic growth was not detected under anaerobic respiration. In  
7 a CFU counting assay, we observed that the addition of Dkstatin-2 resulted in a similar  
8 outcome as the  $\Delta dksA1$  mutant (Fig 4B). Around 10-fold decreases in viable cell numbers  
9 were observed at the end of the growth experiments both in PAO1 treated with Dkstatin-2  
10 and in the  $\Delta dksA1$  mutant, whereas a significant difference in cell numbers was not detected  
11 when Dkstatin-1 was supplemented. Together, these results illustrate that Dkstatin  
12 compounds clearly have an impact on DksA1 activity that is involved in activating major  
13 anaerobic respiration pathways in *P. aeruginosa*, although the degree of impact varies  
14 between the two Dkstatins.

### 15 **Dkstatin-1 and Dkstatin-2 increase antibiotic susceptibility.**

16 *P. aeruginosa* is notorious for its antibiotic resistance [1]. As an opportunistic pathogen,  
17 it has also acquired resistance to multiple drugs [1, 24]. Our previous data showed that the  
18  $\Delta dksA1$  mutant became hyper-susceptible to gentamycin or tetracycline at sub-MIC  
19 conditions [13]. In contrast, the mutant was not more susceptible to  $\beta$ -lactam antibiotics,  
20 such as ampicillin and carbenicillin, than PAO1 [13]. To examine whether the Dkstatin  
21 treatment would lead to the interruption of DksA1 activity resulting in increased antibiotic  
22 susceptibility, we tested imipenem (Imp), gentamycin (GM), tetracycline (TC), kanamycin  
23 (KM), streptomycin (SM) and tobramycin (TB). Dkstatins failed to increase PAO1  
24 susceptibility in response to the treatment with Imp at a 2.5  $\mu$ g/ml concentration (Fig 5A).  
25 Supplementation of Dksatin-1 or Dkstatin-2 both at 150  $\mu$ M concentration significantly

1 reduced cell viability when PAO1 cells were incubated with 2.5 µg/ml of GM (Fig 5B). Here, a  
2 more than 10-fold decrease in cell viability was detected in the presence of either Dkstatin.  
3 Interestingly, increased susceptibility by Dkstatin was also observed during incubation with  
4 other aminoglycoside antibiotics such as KM (Fig 5D), SM (Fig 5E) or TB (Fig 5F). In the  
5 presence of Dkstatin, viable cell numbers of KM-treated PAO1 cells decreased around 10-  
6 fold when compared with the DMSO-treated PAO1 control (Fig 5D). Severe loss of viability  
7 was observed in PAO1 cells being co-treated with SM and Dkstatin as well (Fig 5E). We also  
8 observed that Dkstatin treatment increased PAO1's susceptibility to 8 µg/ml of TC, an  
9 antibiotic that also inhibits protein synthesis machinery (Fig 5C). These results indicate that  
10 Dkstatins specifically increase bacterial susceptibilities to antibiotics that specifically target  
11 protein biosynthesis in *P. aeruginosa*.

## 12 **Dkstatins interfere with DksA1's interaction with RNA polymerase.**

13 Action of DksA1 is dependent on its interaction with RNA polymerase (RNAP). It was  
14 reported that DksA1 binds to the β subunit of RNAP in *E. coli* [11]. We hypothesized that  
15 Dkstatins may work by one of two possible scenarios. First, Dkstatins may inhibit the  
16 production of DksA1 in *P. aeruginosa*. Second, Dkstatins may interfere with DksA1's binding  
17 to RNAP. To precisely understand how Dkstatins inhibit DksA1 activity, we constructed a  
18 modified PAO1 strain, where the 3'-end of the *dksA1* gene is fused with the nucleotide  
19 sequences coding for the 3XFLAG tag. In this strain, DksA1 is translated as a fusion protein  
20 with the 3XFLAG tag at its C-terminus. To begin with, we tested whether Dkstatin  
21 compounds affect production of DksA1 through western blotting. As a result, western blotting  
22 using an anti-FLAG antibody indicates that the level of DksA1 production was never  
23 changed by the treatment with either Dkstatin (Fig 6A). The DksA1-specific band was not  
24 detected in the sample prepared from the original PAO1 strain (Fig 6A, far-left lane). Next,  
25 we conducted a co-immunoprecipitation assay using a magnetic bead (on which an anti-

1 FLAG antibody is immobilized) to examine the effect of Dkstatin treatment on the interaction  
2 of DksA1 with RNAP. When precipitated fractions in each preparation were probed with an  
3 anti-RpoB antibody, the RpoB band intensity was markedly reduced in both Dkstatin-treated  
4 samples, with Dkstatin-2 being superior to Dkstatin-1 in conferring such effects (Fig 6B).  
5 Taken together, these results demonstrate that Dkstatins likely act as inhibitors at the post-  
6 translational level by interfering with DksA1's binding to RNAP.

### 7 **Dkstatin-1 and Dkstatin-2 induced distinct changes in transcriptome profiles of** 8 **PAO1.**

9 Although two Dkstatins invariably suppressed the activity of DksA1, inducing similar  
10 phenotypic changes, the chemical structures of the two molecules are quite different (Fig 1A  
11 and 1B). To better understand the effects of Dkstatin treatment, we compared transcriptome  
12 landscapes of PAO1 grown without or with either Dkstatin. A global view of the entire  
13 transcriptome uncovered the substantial differences between cells treated with Dkstatin-1 or  
14 Dkstatin-2 (S4A Fig). This finding was also supported by our PCA plot, which indicates that  
15 either treatment induced divergent changes (S4B Fig). As far as the number of affected  
16 genes was concerned, the effect of Dkstatin-1 treatment appeared stronger than that exerted  
17 by Dkstatin-2 (Fig 7A). Again, among those genes whose expression was substantially  
18 altered, only a small portion was simultaneously affected by either compound.

19 At first, we confirmed that the transcription of genes encoding ribosomal proteins was  
20 upregulated during the treatment with Dkstatin-1 or Dkstatin-2, with the latter exhibiting more  
21 significant effects (Fig 7B). These results further verified that two compounds can in fact  
22 effectively compromise the activity of DksA1. We then examined the effects of Dkstatin  
23 treatment on the expression of genes involved in QS and QS-mediated virulence factor  
24 production. As shown in Fig 7C, transcription of genes encoding autoinducer synthases and  
25 autoinducer-binding receptors was suppressed in Dkstatin-treated PAO1 cells. Among these,

1 *pqsABCDE* and *phnAB* genes that constitute the PQS biosynthesis cluster were most  
2 affected. Importantly, the expression of virulence-associated genes was remarkably  
3 decreased, especially in response to the treatment with Dkstatin-1 (Fig 7D). Genes coding  
4 for elastase (*lasB*), alkaline protease (*aprADEF*) and rhamnolipid (*rhlAB*) were considerably  
5 downregulated. Similarly, transcription of genes involved in phenazines production  
6 (*phzA1~G1* and *phzA2~G2*) and siderophore biosynthesis (*pchA~G* and *pchR*) were also  
7 suppressed in Dkstatin-treated cells (Fig 7D). These results clearly suggest that Dkstatin-  
8 induced virulence suppression is due to the effects manifested at the transcriptional level. In  
9 addition, gene expression for the production of hydrogen cyanide (*hcnA~C*), and type II  
10 secretion machinery (*tadB~D*) was less active in the presence of Dkstatins.

11 In our previous data shown in Fig 4A, Dkstatin treatments suppressed anaerobic  
12 respiratory growth of PAO1. In *P. aeruginosa*, anaerobic respiration is mediated by a series  
13 of reductions from nitrate ( $\text{NO}_3^-$ ) to  $\text{N}_2$  with nitrite ( $\text{NO}_2^-$ ), nitric oxide (NO) and nitrous oxide  
14 ( $\text{N}_2\text{O}$ ) as intermediates [25]. The expression of genes involved in the activity of nitrate  
15 reductase (NAR) that mediates the first step of anaerobic denitrification was slightly  
16 increased in the presence of Dkstatins. In contrast, Dkstatins significantly suppressed the  
17 expressions of gene clusters (*nirSMCFLGHJND* and *norCBD*) encoding nitrite reductase  
18 (NIR) and nitric oxide reductase (NOR) that catalyze the next steps of denitrification to  
19 produce nitrous oxide [26]. Similarly, the expression of *nosRZDFYL* cluster encoding nitrous  
20 oxide reductase also invariably decreased during Dkstatin treatment (Fig 7E).

21 Our data shown in Fig 2A indicate that Dkstatin-2 stimulated PAO1 growth in LB. To  
22 address this unexpected phenomenon, our interest also reached the genes involved in  
23 energy metabolism such as systems for electron transport and ATP biosynthesis. The two  
24 gene clusters, *ccoN1O1Q1P1* and *ccoN2O2Q2P2*, encode subunits of cbb3-type  
25 cytochrome oxidase, a critical enzyme for aerobic respiration [27, 28]. Compared to the  
26 control PAO1 cells, transcription of these two gene clusters was remarkably increased in

1 PAO1 cells treated with Dkstatin-2 (Fig 7F). Furthermore, a large operon *atpABCDEFGH*  
2 encoding ATP synthase complex was more actively transcribed in the same cells (Fig 7G).  
3 These results provided insight into how Dkstatin-2 treatment promoted the PAO1 aerobic  
4 growth. Collectively, our RNASeq analysis revealed that two Dkstatin compounds induced  
5 transcriptional changes, which were well reflected at the phenotypic level. In addition, we  
6 further confirmed that the wild type PAO1 cells subjected to Dkstatin treatment behaved like  
7 a  $\Delta dksA1$  mutant.

### 8 **Dkstatin-1 and Dkstatin-2 attenuated virulence of *P. aeruginosa* in vivo.**

9 As the production of virulence factors decreased by Dkstatin treatment, we next tested  
10 whether Dkstatin-induced virulence attenuation is still valid *in vivo* using 8-week-old C57BL/6  
11 female mice. All mice were intranasally infected with freshly harvested PAO1 cells ( $\sim 10^6$   
12 CFU). Mice infected with PAO1 (n=3) perished within 36 hours (Fig 8A, green line). On the  
13 other hand, when either Dkstatin was supplemented together with PAO1 infection (n=4),  
14 mice exhibited significantly increased survival rates and survived even after at 48 hour post-  
15 infection (Fig 8A). In a separate set of experiments, we also examined the effect of Dkstatin  
16 treatment on PAO1 proliferation inside the host airway. In this case, mice were infected with  
17  $3 \times 10^6$  PAO1 cells. At 12 hour post-infection, the average bacterial load in the lungs of the  
18 control group was  $\sim 5.2 \times 10^5$  CFU. Importantly, the bacterial load was significantly decreased  
19 to  $\sim 4.7 \times 10^4$  CFU, when treated with Dkstatin-1. In contrast, the bacterial count was not  
20 decreased by Dkstatin-2 (Fig 8B). This finding correlates well with our RNASeq results, in  
21 that Dkstatin-1 treatment strongly suppressed the transcription of virulence-associated  
22 genes (Fig 7F). We also assessed the effects of Dkstatin treatment by visualizing lung  
23 tissues. Intranasal infection of PAO1 led to infiltration of immune cells and a reduction of  
24 alveolar spaces, which are indicators of severe airway infections (Fig 8F). When PAO1-  
25 infected mice were treated with Dkstatins, inflammatory symptoms substantially decreased

1 compared with those observed in the control infection group (Fig 8G and H vs. Fig 8F). The  
2 presence of lung damage was not obvious when the mice were treated with Dkstatin-1 (Fig  
3 8D) or Dkstatin-2 (Fig 8E). Together, these results suggested that Dkstatin-1 and Dkstatin-2  
4 are not toxic to the murine host and thereby these two molecules may have potential to be  
5 developed as anti-Pseudomonas agents for human patients.



## 1 Discussion

2 Previous studies from our lab revealed that DksA1 acts as a major transcriptional  
3 regulator for QS-mediated virulence expression in *P. aeruginosa* [13]. In addition, DksA1 is  
4 also required for uninterrupted expression of genes encoding proteins for biofilm formation,  
5 motility, anaerobic respiration through denitrification and polyamine metabolism [13]. As  
6 DksA1 participates in regulating a wide range of phenotypes, including virulence in *P.*  
7 *aeruginosa*, we postulated that DksA1 is an effective drug target, the inhibition of which may  
8 result in virulence attenuation, eventually leading to control of recalcitrant *P. aeruginosa*  
9 infections. The success of our compound library screen is attributed to the following aspects.  
10 First, the use of formazan production as a surrogate marker of DksA1 activity provided a  
11 system that allowed us to screen 6,970 compounds with minimal error. Second, the reporter  
12 strain, in which the transcriptional fusion of  $P_{rpsB}::lacZ$  has been inserted as a single copy at  
13 a nonfunctional region of PAO1 genome [29], provided a reliable method for the second-  
14 stage verification. This was critical because reduced production of formazan can result from  
15 other metabolic alterations. Lastly, Dkstatin-1 and Dkstatin-2 were found to be commercially  
16 available for purchase, enabling us to test the effects of these two final candidates at higher  
17 concentrations with no limited supply. Considering that the initial screening could only be  
18 performed with compounds at 50  $\mu$ M concentration, the availability of Dkstatins made this  
19 study more feasible.

20 Dkstatin-1 and Dkstatin-2 have quite different chemical structures. Both compounds,  
21 however, induced specific outcomes mediated by loss of DksA1 activity, ranging from (i)  
22 increased *rpsB* expression, (ii) reduced elastase production, (iii) reduced pyocyanin  
23 production, (iv) suppressed autoinducer production and (v) defective anaerobic respiration.  
24 These results display the common features of two compounds affecting DksA1 activity.  
25 DksA1 possesses a  $Zn^{2+}$  binding motif (CXXC-N<sup>17</sup>-CXXC) consisting of 4 cysteine residues  
26 at its C-terminus, and this motif is critical for its structure and function. Of note, the cysteine

1 thiol group is highly susceptible to oxidation by electrophilic molecules [3, 19, 30].  
2 Regardless of the structural differences, both compounds harbor reactive groups, such as  
3 fluorine [31] and butanone [32, 33]. Thus, it is reasonable to hypothesize that oxidizing  
4 groups in Dkstatins may affect the DksA1 structure, which in turn leads to interference with  
5 DksA1 binding to a subunit of RNAP. Future work should focus on understanding Dkstatin-  
6 induced structural modification of DksA1 and its downstream consequences. To this end, it is  
7 necessary to explore other chemicals harboring diverse oxidizing moieties as well.

8 Based on Fig 2A, Dkstain-2 stimulated bacterial growth. While the enhanced bacterial  
9 growth was not fully reflected in the viable cell counting assay, we became interested in this  
10 unexpected result. It is counterintuitive that a compound that has potential to be developed  
11 as an anti-infective agent also stimulates bacterial growth. However, it is also noteworthy  
12 that actively replicating cells are well known to be more susceptible to antibiotic treatment  
13 [34]. In line with this notion, *P. aeruginosa* invaders might be more exposed to host immunity  
14 when they multiply at a faster rate. In contrast to the aerobic culture, Dkstatin-2 strongly  
15 suppressed anaerobic respiratory growth of PAO1 (Fig 4B). Earlier studies clearly suggest  
16 that *P. aeruginosa* may benefit from anaerobiosis during chronic airway infection [25]. It will  
17 be important to further clarify whether Dkstatin-2 specifically suppresses chronic airway  
18 infection by *P. aeruginosa*.

19 QS, a cell density-dependent gene regulatory system, is crucial for the production of  
20 virulence determinants in *P. aeruginosa* [22]. Therefore, *P. aeruginosa* QS has been  
21 extensively studied as a therapeutic target for virulence attenuation [1, 22, 35]. To date,  
22 strategies for QS inhibition include receptor inactivation [36], inhibition of signal synthesis,  
23 use of autoinducer analogues [37], signal degradation [38, 39] and use in combination with  
24 antibiotics [37]. Flavonoids bind QS receptor, LasR and RhlR, to reduce virulence factor  
25 production [36]. N-decanoyl-L-homoserine benzyl ester, a structural analogue of 3-oxo-C12-  
26 HSL, downregulates elastase production, swarming motility and biofilm formation without

1 growth defects [21]. This QS-inhibitor also synergistically interacts with gentamicin and  
2 tobramycin [37]. Another QS inhibitor, meta-bromo-thiolactone, affects LasR and RhIR  
3 activity to decrease pyocyanin production and biofilm formation in *P. aeruginosa* PA14 strain  
4 [40]. In a screen with a synthetic N-acyl-homoserine lactone (A-HSL) library, various HSL  
5 derivatives were found to antagonize the activity of LasR and LuxR in *P. aeruginosa* and  
6 *Vibrio fischeri* [41]. Likewise, a couple of autoinducer analogues were found to antagonize  
7 TraR, a QS-related LuxR homologue in *Agrobacterium tumefaciens* [41]. Of note, the  
8 previously mentioned examples show findings from studies designed to uncover molecules  
9 that directly inhibit or antagonize at various levels of the *P. aeruginosa* QS machinery. In the  
10 present study, however, we discovered molecules that target DksA1, whose involvement in *P.*  
11 *aeruginosa* QS is relatively a new subject. We argue that DksA1 should be an avenue for  
12 future exploration in the context of development of *P. aeruginosa* QS inhibitors with a focus  
13 on its molecular nature and its impact on virulence gene regulation.

14 Our RNASeq analysis clearly suggested that the two Dkstatins induced distinct changes  
15 in the genome-wide transcription pattern. When differentially expressed genes (DEGs) were  
16 categorized based on the gene ontology (GO) term, a larger number of GO terms were  
17 retrieved in Dkstatin-2 treated group (11 terms) than in the Dkstatin-1 treated group (9 terms).  
18 Of particular interest, the most significantly presented GO term in the Dkstatin-2 treated  
19 group was “translation” with all 23 upregulated genes (S5B Fig). Along with this GO term,  
20 several other functional categories, such as ribosomal assembly and energy metabolism,  
21 were also identified with genes of enhanced transcription. Given that these changes  
22 resemble the characteristics of the  $\Delta dksA1$  mutant, it is likely that Dkstatin-2, as compared  
23 with Dkstatin-1, is more potent in inhibiting DksA1 activity. Consistent with this idea, binding  
24 of DksA1::FLAG and RpoB was hampered to a greater degree by Dkstatin-2 (Fig 6B). In the  
25 Dkstatin-1 treated group, on the other hand, the “phenazines biosynthesis process” was  
26 most significantly presented (S5A Fig). In addition, 10 out of 12 genes in the “pathogenesis”

1 category and all genes in the “secretion”, “type VI secretion system” and “chemotaxis” terms  
2 were downregulated in Dkstatin-1 treated cells (S5A Fig), suggesting that Dkstatin-1 may be  
3 more directly engaged in attenuating *P. aeruginosa* virulence. Collectively, these additional  
4 bioinformatic analyses further support the notion that Dkstatin-1 and Dkstatin-2 may operate  
5 in different modes of action even though these two molecules were identified as DksA1  
6 inhibitors.

7       Antibiotic resistance in many human pathogens (including *P. aeruginosa*) has already  
8 become a global healthcare problem. Against the opportunistic features of *P. aeruginosa*, we  
9 need to come up with antibiotic-independent infection control strategies. Interventions that  
10 could achieve virulence attenuation without imposing selective pressure have been actively  
11 attempted [35]. Dkstatins identified in the present study significantly downregulated *P.*  
12 *aeruginosa* virulence by suppressing QS mechanisms. Moreover, Dkstatins induced  
13 elevated antibiotic efficacy at sub-MIC conditions, especially for antibiotics that inactivate  
14 protein synthesis. As DksA1 suppresses transcription of genes encoding rRNA and  
15 ribosomal proteins, macromolecular ribosomes are readily accumulated when DksA1 is  
16 inactivated. Therefore, it is anticipated that ribosome-targeting antibiotics are more active  
17 under such conditions.

18       In our animal model of acute infection, two Dkstatin molecules successfully protected  
19 mice from a lethal dose of PAO1 infection. Provided that Dkstatins are safe in humans, they  
20 will broaden our options to treat *P. aeruginosa* infections with low risk of antibiotic resistance.  
21 Collectively, Dkstatins are attractive drug candidates in establishing future plans to cope with  
22 antibiotic-resistant infections. We anticipate that future investigations will propose detailed  
23 molecular mechanisms of Dkstatins and apply these in human trials.

24  
25

## 1 **Methods**

2 **Ethics statement.** All animal studies were performed in compliance with the guidelines  
3 provided by the Department of Animal Resources of Yonsei Biomedical Research Institute.  
4 The Committee on the Ethics of Animal Experiments at the Yonsei University College of  
5 Medicine approved this study (permit number 2018-0246).

6 **Bacterial strains, culture conditions and chemicals.** Bacterial species and plasmids  
7 used in this study are listed in S1 Table. A laboratory strain of *P. aeruginosa*, PAO1, was  
8 used as a wild type strain. Unless otherwise specified, bacterial strains were cultivated in  
9 Luria-Bertani media (LB; 1% (w/v) tryptone, 0.5% (w/v) yeast extract, and 1% (w/v) sodium  
10 chloride) at 37°C. Standard cloning procedures that involved allelic exchange were  
11 performed. When necessary, ampicillin (100 µg/ml), carbenicillin (100 µg/ml), gentamycin  
12 (60 µg/ml), or irgasan (25 µg/ml) were used for clonal selection. DNA sequences encoding  
13 3XFLAG tag were amplified and ligated to the downstream of the multi-cloning site (MCS) of  
14 the pBAD24 plasmid, resulting in the construction of pBAD24F. Then, the *dksA1* gene was  
15 cloned into the MCS of pBAD24F. The resulting *dksA1::FLAG* sequence was amplified and  
16 ligated into pCVD442 [34] for chromosomal integration. The promoter region of *rpsB* gene  
17 was fused with the promoter-less *lacZ* open reading frame ( $P_{rpsB}::lacZ$ ), and the resulting  
18 construct was cloned into the plasmid, pUC18-mini-Tn7t-Gm-*lacZ* [29] for chromosomal  
19 integration. Dkstatin-1 (4,4'-(4,4'-biphenyldiyl disulfonyl)di(2-butanone)) and Dkstatin-2 (N-  
20 ethyl-3-[(3-fluorophenyl)methoxy]-N-[(1-methyl-1H-imidazol-5-yl)methyl]aniline) were  
21 purchased from Chembridge Corp. (San Diego, CA) and Asinex Inc. (Amsterdam,  
22 Netherlands), respectively.

23 **Screening of Chemical Compounds.** Screening of chemical compounds was  
24 performed in two phases. Using a chemical compound library consisting of 6,970 chemicals

1 provided by the Korea Chemical Bank (<https://chembank.org/>), we first screened for  
2 chemical compounds that inhibit DksA1 activity. The total library was 10-fold diluted with  
3 DMSO to increase the volume. A 100-fold diluted overnight culture of *P. aeruginosa* PAO1  
4 and the  $\Delta dksA1$  mutant were then incubated in fresh media for an additional 4 hours to  
5 activate the cells. The obtained OD<sub>600</sub> values of these strains were adjusted to 1.0. Then,  
6 120  $\mu$ l of the adjusted culture was inoculated in 96-well plates that contain 50  $\mu$ M of  
7 chemical compounds, and these were incubated at 37°C for 1 hour to examine formazan  
8 production. After incubation, 0.05 mg/ml of thiazolyl blue tetrazolium bromide (Sigma-Aldrich)  
9 was distributed into each well of the test plates, and they were incubated for an additional 30  
10 min at 37°C. The formazan production was measured at a 550 nm wavelength after  
11 dissolving it in DMSO. The top 50 compounds that presented the lowest levels of formazan  
12 production during the first screening phase were then subjected to a subsequent screening.  
13 In the following screening phase, a reporter strain PAO1 P<sub>*rpsB*</sub>::*lacZ* was diluted 100-fold and  
14 added to 1.5 ml of LB supplemented with 50  $\mu$ M of each of the 50 compounds. The sample  
15 was then incubated for 4 hours at 37°C with shaking. *rpsB* expression of the reporter strain  
16 was represented in Miller Units and was measured as described previously [13]. Based on  
17 the *rpsB* expression, the top 20 compounds among the 50 previously screened compounds  
18 were selected. To further narrow down the candidate compounds from the 20 selected  
19 compounds, the reporter strain was incubated in 3 ml of LB with the addition of 50  $\mu$ M of  
20 each of the 20 compounds for 4 hours with shaking. Measurement of the elastase activity  
21 and quantification of *rpsB* expression allowed us to come down to the 4 most efficacious  
22 compounds: 55B05, 02G09, 86B09, and 45G08. Then, 50  $\mu$ M of four these compounds  
23 were tested again by measuring elastase activity and *rpsB* expression of reporter strain  
24 incubated in 5 ml of LB for 4 to 8 hours at 37°C. 55B06 and 86B09 were specifically chosen  
25 as they showed sustained effects on elastase activity and *rpsB* expression. Then, 150  $\mu$ M of  
26 55B05 and 86B09 were each added to PAO1 and  $\Delta dksA1$  mutant incubated in 5 ml of LB

1 medium for 8 hours at 37°C to measure formazan production.

2 **Elastase and pyocyanin assay.** Elastase activity was measured as previously described  
3 [42]. First, 500 µl of supernatant from cultures incubated with 50 µM or 150 µM of the  
4 compounds for 4 hours or 8 hours was mixed with 1 ml of 30 mM Tris-HCl buffer containing  
5 10 mg/ml of Elastin-Congo Red (Sigma-Aldrich). The mixture was then incubated with  
6 shaking at 37°C for 1–2 hours. After the incubation, 1 ml of the mixture was transferred into  
7 a micro tube, which was centrifuged at 13,000 rpm for 1 min. In the pyocyanin assay, 5 ml of  
8 supernatants from the cultures incubated for 8 hours with 150 µM Dkstatin compounds were  
9 harvested by centrifugation at 3,000 rpm for 20 min. They were then filter-sterilized (0.2-µm  
10 pore size, Sartorius Minisart Sterile EO filters; Sartorius AG). Then, 4 ml of chloroform was  
11 added to 8 ml of the supernatants in a 15 ml conical tube, and the mixture was homogenized.  
12 After homogenization, the tubes were centrifuged at 3,000 rpm for 10 min to collect the blue  
13 layer fraction submerged to the bottom of the tube. Then, 4 ml of the collected blue layer  
14 was transferred into a new tube, and 2 ml of 0.2 N HCl was added to produce a red colored  
15 mixture. For the assay, 1 ml of the mixture was then transferred into a microtube for  
16 centrifugation at 13,000 rpm for 1 min. Absorbance at 520 nm (OD<sub>520</sub>) was then measured  
17 for the samples.

18 **Autoinducer assay.** In HSL measurements, both C4-HSL and 3-oxo-C12-HSL were  
19 extracted from 5 ml of culture supernatants using the equivalent volume of acidified ethyl  
20 acetate. The extractions were repeated twice to fully collect the ethyl acetate fraction. N<sub>2</sub> gas  
21 was used to evaporate and dry out the collected ethyl acetate fraction. The residues were  
22 dissolved in 250 µl of HPLC grade ethyl acetate to obtain 20-fold concentrated extracts.  
23 Measurement of 3-oxo-C12-HSL was performed using an *E. coli* strain harboring reporter  
24 plasmid pKDT17 containing a copy of *lasR-lacZ* transcriptional fusion [43]. Samples were  
25 100-fold diluted to culture a volume of reporter strain, and they were then tested to measure

1  $\beta$ -galactosidase activity. The Miller Units from samples were calculated as described  
2 previously [13]. The measurement of C4-HSL was conducted through violacein productions  
3 of the *Chromobacterium violaceum* CV026 strain [44]. The CV026 strain was incubated in 5  
4 ml of LB and LB supplemented with 100-fold diluted extract. After incubation, cell pellets in 1  
5 ml of culture were harvested by centrifugation at 13,000 rpm for 3 min. The pellets were then  
6 re-suspended using HPLC grade DMSO to dissolve violacein. Violacein was measured at  
7 575 nm absorbance and normalized using the OD<sub>600</sub> value of CV026.

8 **DNA manipulation.** Primers used in the study are listed in S2 Table. Plasmid preparation  
9 was performed using a Plasmid mini extraction kit (Bioneer Inc., Seoul). Restriction enzyme  
10 digestion, ligation, and agarose gel electrophoresis were performed by following standard  
11 methods. A Gibson assembly kit (New England Biolabs Inc., MA.) was used in cloning to  
12 produce the *dksA1*-fused 3XFLAG strain. Transformation of *E. coli* was carried out by  
13 electroporation. Competent *E. coli* cells for electroporation were prepared by repeated  
14 washing with 300 mM sucrose. Electroporation settings were 2.5kV, 25 $\mu$ F and 200  $\Omega$  for a 2  
15 mm electroporation cuvette. The oligonucleotide primers synthesis and sequencing DNA  
16 were performed by Macrogen, Korea.

17 **Antibiotic susceptibility test.** Overnight cultured PAO1 was inoculated to 100-fold  
18 dilution in 2 ml of LB supplemented with gentamicin, imipenem, streptomycin, tetracycline,  
19 kanamycin and tobramycin ranging from 1  $\mu$ g/ml to 25  $\mu$ g/ml, and 150  $\mu$ M of Dkstatin-1 or  
20 Dkstatin-2. The incubation took 6 hours at 37°C with vigorous shaking. Then, respective  
21 incubated samples were serially diluted by 10-fold in 1 ml of PBS, and 10  $\mu$ l of each dilute  
22 was spotted onto an LB agar plate for CFU counts. The plates were incubated overnight at  
23 37°C without shaking.

24 **Western blot and immunoprecipitation.** PAO1 *dksA1::3xFLAG* strain was grown in 20



1 ml of LB medium supplemented with or without 150  $\mu$ M of Dkstatin-1 and Dkstatin-2 for 6 to  
2 8 hours. Whole cells were pelleted by centrifugation at 3,000 rpm for 30 min at 4°C and were  
3 re-suspended with 600 to 800  $\mu$ l of lysis buffer (50 mM Tris-HCl pH 7.5, 75 mM NaCl, 10 mM  
4 MgCl<sub>2</sub>, 10% glycerol, 1 mM EDTA, 1 mM PMSF and 0.01% Triton X-100) with 8  $\mu$ l of SIGMA  
5 FAST protease inhibitor cocktail (Sigma-Aldrich). The pellets were then sonicated at 30%  
6 amplitude for 10 sec with 10 sec intervals on ice and were then centrifuged for 30 min at 4°C  
7 and 14,000rpm. The supernatants of the lysates were collected and placed into new tubes.  
8 Their volumes were adjusted to contain equal quantities of total proteins. Then, 10 to 800  $\mu$ l  
9 of the adjusted samples were used for western blots and immunoprecipitation. For  
10 DksA1::3xFLAG blotting, 10  $\mu$ l of samples were loaded on 12% SDS-PAGE and transferred  
11 to Amersham Protran premium 0.2  $\mu$ m nitrocellulose membranes (GE Healthcare Life  
12 Sciences) for 1 hour in an ice-cold transfer buffer (25mM Tris, 192mM glycine pH 8.3 20%  
13 methanol (v/v)). Membranes were blocked with a 5% BSA containing TBST solution  
14 overnight at 4°C on a rocking shaker. Blots were incubated with anti-FLAG (Sigma-Aldrich)  
15 and anti-rabbit secondary antibodies (Thermo-fisher) and revealed by chemi-luminescence.  
16 All washes were performed with a TBST solution without BSA. Immunoprecipitation was  
17 conducted using ~800  $\mu$ l of samples with 25  $\mu$ l of M2 Anti-FLAG magnetic beads (Sigma-  
18 Aldrich) after incubating overnight at 4°C on a rocking shaker. Beads were pelleted using a  
19 magnet and were washed once with the lysis buffer. Samples bound to the beads were  
20 eluted in 30  $\mu$ l of lysis buffer by heating at 100°C for 10 min. The eluted samples were then  
21 loaded on 10% SDS-PAGE and blotted by anti-FLAG Ab (Sigma) or anti-*E.coli* RpoB Ab  
22 (Abcam).

23 **RNASeq analysis.** To extract total RNA, *P. aeruginosa* PAO1 was incubated for 2 hours in  
24 5 ml of LB with vigorous shaking at 37°C. Then, additional incubation was conducted for 1  
25 hour under the same condition with 150  $\mu$ M of Dkstatin-1 or Dkstatin-2 supplement. Total

1 RNA samples were extracted using an RNeasy mini kit (Qiagen), and total DNA was  
2 eliminated using RNase-free DNase set (Qiagen) following the manufacturer's instructions.  
3 The extraction was performed as an experimental duplicate. Transcriptome profile  
4 comparison and processing the expression data were provided by Ebiogen (Korea). RNA  
5 quality was assessed by an Agilent 2100 bioanalyzer using the RNA 6000 Nano Chip  
6 (Agilent Technologies, Amstelveen, The Netherlands), and RNA quantification was  
7 performed using an ND-2000 Spectrophotometer (Thermo Inc., DE, USA). For control and  
8 testing RNAs, rRNA was removed using a Ribo-Zero Magnetic kit (Epicentre Inc., USA) from  
9 each 5 ug of total RNA. The construction of a library was performed using a SMARTer  
10 Stranded RNA-Seq Kit (Clontech Lab Inc., CA, USA) according to the manufacturer's  
11 instructions. The rRNA depleted RNAs were used for the cDNA synthesis and shearing,  
12 following manufacturer's instructions. Indexing was performed using the Illumina indexes 1–  
13 12. The enrichment step was carried out using PCR. Subsequently, libraries were checked  
14 using the Agilent 2100 bioanalyzer (DNA High Sensitivity Kit) to evaluate the mean fragment  
15 size. Quantification was performed using the library quantification kit using a StepOne Real-  
16 Time PCR System (Life Technologies Inc., USA). High throughput sequencing was  
17 performed as paired-end 100 sequencing using HiSeq 2500 (Illumina Inc., USA). Bacterial-  
18 Seq reads were mapped using a Bowtie2 software tool to obtain the alignment file.  
19 Differentially expressed genes were determined based on counts from unique and multiple  
20 alignments using EdgeR within R (R development Core Team, 2016) using Bioconductor [45].  
21 The alignment file also was used for assembling transcripts. The quantile normalization  
22 method was used for comparisons between samples. Gene classification was based on  
23 searches done by DAVID (<http://david.abcc.ncifcrf.gov/>).

24 **Mouse infection.** Eight-week-old female C57BL/6 mice (Orient, Korea) were infected with  
25 PAO1 and a combination of Dksatin-1 or Dkstatin-2. PAO1 pellets incubated in LB broth at

1 37°C for 6 hours were resuspended in 1 ml of sterile phosphate-buffered saline (PBS)  
2 containing 1% of DMSO or 150 µM of Dkstatin compounds, and they were adjusted to 10<sup>6</sup>  
3 cells per 20 µl as an initial infection dose. Mice were anesthetized by injection of 20% (v/v)  
4 ketamine and 8% (v/v) Rompun mixed in saline. During anesthetization, 20 µl of prepared  
5 bacterial cells were inhaled directly through the nose by a pipette as previously described  
6 [46]. The survival of the mice was monitored for 48 hours with 2 hour intervals. The survival  
7 of the mice was expressed as a Kaplan-Meier curve using Graph Pad Prism software  
8 ([www.graphpad.com](http://www.graphpad.com)). To measure the bacterial load in the lungs, another set of mice (n=4)  
9 were infected with the same administration above. All mice were euthanized in a CO<sub>2</sub> gas  
10 chamber 12 hours post infection. Then, whole lungs from mice in each group were  
11 immediately collected and homogenized for serial dilution in 1 ml of PBS. For histological  
12 observation, lungs were perfused with sterile PBS and staining with hematoxyline and eosin  
13 was conducted following a standard protocol [47].

14 **Statistical analysis.** Statistical analysis of the data in the experiments was carried out by  
15 statistic tools within Graph Pad Prism software ([www.graphpad.com](http://www.graphpad.com)) for the paired Student's  
16 *t*-test. A *p*-value of less than 0.05 was considered statistically significant. All experiments  
17 were repeated for reproducibility.

18

1 **Acknowledgements**

2 This work was supported by grants from the National Research Foundation (NRF) of  
3 Korea, which is funded by the Korean Government (2017M3A9F3041233 and  
4 2019R1A6A1A03032869). This research was also supported by a grant from the Korea  
5 Health Technology R&D Project through the Korea Health Industry Development Institute  
6 (KHIDI), funded by the Ministry of Health & Welfare, Republic of Korea (HI14C1324). We  
7 would like to thank Jun Bum Kim and Jiwon Kim for proofreading the manuscript. The  
8 chemical library used in this study was kindly provided by Korea Chemical Bank  
9 ([www.chembank.org](http://www.chembank.org)) of Korea Research Institute of Chemical Technology.

10 **Author Contributions**

11 K.B.M., W.H., K.M.L. and S.S.Y. conceptualized and designed the experiments. K.B.M and  
12 S.S.Y performed experiments and analyzed the experimental results. K.B.M. and S.S.Y  
13 drafted the manuscript.

14

15

## 1 **References**

- 2 **1.** Moradali MF, Ghods S, Rehm BH. *Pseudomonas aeruginosa* Lifestyle: A Paradigm for  
3 Adaptation, Survival, and Persistence. *Front Cell Infect Microbiol.* 2017;7: 39.  
4 doi:10.3389/fcimb.2017.00039 PMID:28261568
- 5 **2.** Valentini M, Gonzalez D, Mavridou DA, Filloux A. Lifestyle transitions and adaptive  
6 pathogenesis of *Pseudomonas aeruginosa*. *Curr Opin Microbiol.* 2018;41: 15-20.  
7 doi:10.1016/j.mib.2017.11.006 PMID:29166621
- 8 **3.** Gourse RL, Chen AY, Gopalkrishnan S, Sanchez-Vazquez P, Myers A, Ross W.  
9 Transcriptional Responses to ppGpp and DksA. *Annu Rev Microbiol.* 2018;72: 163-184.  
10 doi:10.1146/annurev-micro-090817-062444 PMID:30200857
- 11 **4.** Ross W, Sanchez-Vazquez P, Chen AY, Lee JH, Burgos HL, Gourse RL. ppGpp  
12 Binding to a Site at the RNAP-DksA Interface Accounts for Its Dramatic Effects on  
13 Transcription Initiation during the Stringent Response. *Mol Cell.* 2016;62: 811-823.  
14 doi:10.1016/j.molcel.2016.04.029 PMID:27237053
- 15 **5.** Doniselli N, Rodriguez-Aliaga P, Amidani D, Bardales JA, Bustamante C, Guerra DG,  
16 et al. New insights into the regulatory mechanisms of ppGpp and DksA on *Escherichia*  
17 *coli* RNA polymerase-promoter complex. *Nucleic Acids Res.* 2015;43: 5249-5262.  
18 doi:10.1093/nar/gkv391 PMID:25916853
- 19 **6.** Paul BJ, Barker MM, Ross W, Schneider DA, Webb C, Foster JW, et al. DksA: a critical  
20 component of the transcription initiation machinery that potentiates the regulation of  
21 rRNA promoters by ppGpp and the initiating NTP. *Cell.* 2004;118: 311-322.  
22 doi:10.1016/j.cell.2004.07.009 PMID:15294157
- 23 **7.** Perederina A, Svetlov V, Vassilyeva MN, Tahirov TH, Yokoyama S, Artsimovitch I, et al.  
24 Regulation through the secondary channel--structural framework for ppGpp-DksA  
25 synergism during transcription. *Cell.* 2004;118: 297-309. doi:10.1016/j.cell.2004.06.030  
26 PMID:15294156

- 1 **8.** Bernardo LM, Johansson LU, Solera D, Skarfstad E, Shingler V. The guanosine  
2 tetraphosphate (ppGpp) alarmone, DksA and promoter affinity for RNA polymerase in  
3 regulation of sigma-dependent transcription. *Mol Microbiol.* 2006;60: 749-764.  
4 doi:10.1111/j.1365-2958.2006.05129.x PMID:16629675
- 5 **9.** Kolmsee T, Delic D, Agyenim T, Calles C, Wagner R. Differential stringent control of  
6 *Escherichia coli* rRNA promoters: effects of ppGpp, DksA and the initiating nucleotides.  
7 *Microbiology (Reading).* 2011;157: 2871-2879. doi:10.1099/mic.0.052357-0  
8 PMID:21798983
- 9 **10.** Dalebroux ZD, Svensson SL, Gaynor EC, Swanson MS. ppGpp conjures bacterial  
10 virulence. *Microbiol Mol Biol Rev.* 2010;74: 171-199. doi:10.1128/MMBR.00046-09  
11 PMID:20508246
- 12 **11.** Parshin A, Shiver AL, Lee J, Ozerova M, Schneidman-Duhovny D, Gross CA, et al.  
13 DksA regulates RNA polymerase in *Escherichia coli* through a network of interactions  
14 in the secondary channel that includes Sequence Insertion 1. *Proc Natl Acad Sci U S A.*  
15 2015;112: E6862-6871. doi:10.1073/pnas.1521365112 PMID:26604313
- 16 **12.** Perron K, Comte R, van Delden C. DksA represses ribosomal gene transcription in  
17 *Pseudomonas aeruginosa* by interacting with RNA polymerase on ribosomal promoters.  
18 *Mol Microbiol.* 2005;56: 1087-1102. doi:10.1111/j.1365-2958.2005.04597.x  
19 PMID:15853892
- 20 **13.** Min KB, Yoon SS. Transcriptome analysis reveals that the RNA polymerase-binding  
21 protein DksA1 has pleiotropic functions in *Pseudomonas aeruginosa*. *J Biol Chem.*  
22 2020;295: 3851-3864. doi:10.1074/jbc.RA119.011692 PMID:32047111
- 23 **14.** Gray MJ. Inorganic Polyphosphate Accumulation in *Escherichia coli* Is Regulated by  
24 DksA but Not by (p)ppGpp. *J Bacteriol.* 2019;201. doi:10.1128/JB.00664-18  
25 PMID:30745375
- 26 **15.** Magnusson LU, Gummesson B, Joksimovic P, Farewell A, Nystrom T. Identical,

- 1 independent, and opposing roles of ppGpp and DksA in *Escherichia coli*. *J Bacteriol.*  
2 2007;189: 5193-5202. doi:10.1128/JB.00330-07 PMID:17496080
- 3 **16.** Pal RR, Bag S, Dasgupta S, Das B, Bhadra RK. Functional characterization of the  
4 stringent response regulatory gene *dksA* of *Vibrio cholerae* and its role in modulation of  
5 virulence phenotypes. *J Bacteriol.* 2012;194: 5638-5648. doi:10.1128/JB.00518-12  
6 PMID:22904284
- 7 **17.** Azriel S, Goren A, Rahav G, Gal-Mor O. The Stringent Response Regulator DksA Is  
8 Required for *Salmonella enterica* Serovar Typhimurium Growth in Minimal Medium,  
9 Motility, Biofilm Formation, and Intestinal Colonization. *Infect Immun.* 2016;84: 375-384.  
10 doi:10.1128/IAI.01135-15 PMID:26553464
- 11 **18.** Henard CA, Bourret TJ, Song M, Vazquez-Torres A. Control of redox balance by the  
12 stringent response regulatory protein promotes antioxidant defenses of *Salmonella*. *J*  
13 *Biol Chem.* 2010;285: 36785-36793. doi:10.1074/jbc.M110.160960 PMID:20851888
- 14 **19.** Blaby-Haas CE, Furman R, Rodionov DA, Artsimovitch I, de Crecy-Lagard V. Role of a  
15 Zn-independent DksA in Zn homeostasis and stringent response. *Mol Microbiol.*  
16 2011;79: 700-715. doi:10.1111/j.1365-2958.2010.07475.x PMID:21255113
- 17 **20.** Stockert JC, Horobin RW, Colombo LL, Blazquez-Castro A. Tetrazolium salts and  
18 formazan products in Cell Biology: Viability assessment, fluorescence imaging, and  
19 labeling perspectives. *Acta Histochem.* 2018;120: 159-167.  
20 doi:10.1016/j.acthis.2018.02.005 PMID:29496266
- 21 **21.** Jiang Q, Chen J, Yang C, Yin Y, Yao K. Quorum Sensing: A Prospective Therapeutic  
22 Target for Bacterial Diseases. *Biomed Res Int.* 2019;2019: 2015978.  
23 doi:10.1155/2019/2015978 PMID:31080810
- 24 **22.** Lee J, Zhang L. The hierarchy quorum sensing network in *Pseudomonas aeruginosa*.  
25 *Protein Cell.* 2015;6: 26-41. doi:10.1007/s13238-014-0100-x PMID:25249263
- 26 **23.** Lee KM, Yoon MY, Park Y, Lee JH, Yoon SS. Anaerobiosis-induced loss of cytotoxicity

- 1 is due to inactivation of quorum sensing in *Pseudomonas aeruginosa*. *Infect Immun*.  
2 2011;79: 2792-2800. doi:10.1128/IAI.01361-10 PMID:21555402
- 3 **24.** Nathwani D, Raman G, Sulham K, Gavaghan M, Menon V. Clinical and economic  
4 consequences of hospital-acquired resistant and multidrug-resistant *Pseudomonas*  
5 *aeruginosa* infections: a systematic review and meta-analysis. *Antimicrob Resist Infect*  
6 *Control*. 2014;3: 32. doi:10.1186/2047-2994-3-32 PMID:25371812
- 7 **25.** Yoon SS, Hennigan RF, Hilliard GM, Ochsner UA, Parvatiyar K, Kamani MC, et al.  
8 *Pseudomonas aeruginosa* anaerobic respiration in biofilms: relationships to cystic  
9 fibrosis pathogenesis. *Dev Cell*. 2002;3: 593-603. doi:10.1016/s1534-5807(02)00295-2  
10 PMID:12408810
- 11 **26.** Arai H. Regulation and Function of Versatile Aerobic and Anaerobic Respiratory  
12 Metabolism in *Pseudomonas aeruginosa*. *Front Microbiol*. 2011;2: 103.  
13 doi:10.3389/fmicb.2011.00103 PMID:21833336
- 14 **27.** Hirai T, Osamura T, Ishii M, Arai H. Expression of multiple *cbb3* cytochrome c oxidase  
15 isoforms by combinations of multiple isosubunits in *Pseudomonas aeruginosa*. *Proc*  
16 *Natl Acad Sci U S A*. 2016;113: 12815-12819. doi:10.1073/pnas.1613308113  
17 PMID:27791152
- 18 **28.** Ekici S, Yang H, Koch HG, Daldal F. Novel transporter required for biogenesis of *cbb3*-  
19 type cytochrome c oxidase in *Rhodobacter capsulatus*. *mBio*. 2012;3.  
20 doi:10.1128/mBio.00293-11 PMID:22294680
- 21 **29.** Choi KH, Schweizer HP. mini-Tn7 insertion in bacteria with single attTn7 sites:  
22 example *Pseudomonas aeruginosa*. *Nat Protoc*. 2006;1: 153-161.  
23 doi:10.1038/nprot.2006.24 PMID:17406227
- 24 **30.** Kim JS, Liu L, Fitzsimmons LF, Wang Y, Crawford MA, Mastrogiovanni M, et al. DksA-  
25 DnaJ redox interactions provide a signal for the activation of bacterial RNA polymerase.  
26 *Proc Natl Acad Sci U S A*. 2018;115: E11780-E11789. doi:10.1073/pnas.1813572115



- 1 PMID:30429329
- 2 **31.** Berger R, Resnati G, Metrangolo P, Weber E, Hulliger J. Organic fluorine compounds:  
3 a great opportunity for enhanced materials properties. *Chem Soc Rev.* 2011;40: 3496-  
4 3508. doi:10.1039/c0cs00221f PMID:21448484
- 5 **32.** Ikeda H, Yukawa M, Niiya T. Ab initio molecular orbital study of the reactivity of active  
6 alkyl groups. VII. Solvent effects on the formation of enolate isomers from 2-butanone  
7 with methoxide anion in methanol. *Chem Pharm Bull (Tokyo).* 2006;54: 731-734.  
8 doi:10.1248/cpb.54.731 PMID:16651780
- 9 **33.** Cloutier JF, Drouin R, Weinfeld M, O'Connor TR, Castonguay A. Characterization and  
10 mapping of DNA damage induced by reactive metabolites of 4-(methylnitrosamino)-1-  
11 (3-pyridyl)-1-butanone (NNK) at nucleotide resolution in human genomic DNA. *J Mol*  
12 *Biol.* 2001;313: 539-557. doi:10.1006/jmbi.2001.4997 PMID:11676538
- 13 **34.** Kim HY, Go J, Lee KM, Oh YT, Yoon SS. Guanosine tetra- and pentaphosphate  
14 increase antibiotic tolerance by reducing reactive oxygen species production in *Vibrio*  
15 *cholerae*. *J Biol Chem.* 2018;293: 5679-5694. doi:10.1074/jbc.RA117.000383  
16 PMID:29475943
- 17 **35.** Klockgether J, Tummler B. Recent advances in understanding *Pseudomonas*  
18 *aeruginosa* as a pathogen. *F1000Res.* 2017;6: 1261.  
19 doi:10.12688/f1000research.10506.1 PMID:28794863
- 20 **36.** Paczkowski JE, Mukherjee S, McCreedy AR, Cong JP, Aquino CJ, Kim H, et al.  
21 Flavonoids Suppress *Pseudomonas aeruginosa* Virulence through Allosteric Inhibition  
22 of Quorum-sensing Receptors. *J Biol Chem.* 2017;292: 4064-4076.  
23 doi:10.1074/jbc.M116.770552 PMID:28119451
- 24 **37.** Yang YX, Xu ZH, Zhang YQ, Tian J, Weng LX, Wang LH. A new quorum-sensing  
25 inhibitor attenuates virulence and decreases antibiotic resistance in *Pseudomonas*  
26 *aeruginosa*. *J Microbiol.* 2012;50: 987-993. doi:10.1007/s12275-012-2149-7

- 1 PMID:23274985
- 2 **38.** Fan X, Liang M, Wang L, Chen R, Li H, Liu X. Aii810, a Novel Cold-Adapted N-  
3 Acylhomoserine Lactonase Discovered in a Metagenome, Can Strongly Attenuate  
4 *Pseudomonas aeruginosa* Virulence Factors and Biofilm Formation. *Front Microbiol.*  
5 2017;8: 1950. doi:10.3389/fmicb.2017.01950 PMID:29067011
- 6 **39.** Guendouze A, Plener L, Bzdrenga J, Jacquet P, Remy B, Elias M, et al. Effect of  
7 Quorum Quenching Lactonase in Clinical Isolates of *Pseudomonas aeruginosa* and  
8 Comparison with Quorum Sensing Inhibitors. *Front Microbiol.* 2017;8: 227.  
9 doi:10.3389/fmicb.2017.00227 PMID:28261183
- 10 **40.** O'Loughlin CT, Miller LC, Siryaporn A, Drescher K, Semmelhack MF, Bassler BL. A  
11 quorum-sensing inhibitor blocks *Pseudomonas aeruginosa* virulence and biofilm  
12 formation. *Proc Natl Acad Sci U S A.* 2013;110: 17981-17986.  
13 doi:10.1073/pnas.1316981110 PMID:24143808
- 14 **41.** Geske GD, O'Neill JC, Miller DM, Mattmann ME, Blackwell HE. Modulation of bacterial  
15 quorum sensing with synthetic ligands: systematic evaluation of N-acylated  
16 homoserine lactones in multiple species and new insights into their mechanisms of  
17 action. *J Am Chem Soc.* 2007;129: 13613-13625. doi:10.1021/ja074135h  
18 PMID:17927181
- 19 **42.** Pearson JP, Pesci EC, Iglewski BH. Roles of *Pseudomonas aeruginosa* las and rhl  
20 quorum-sensing systems in control of elastase and rhamnolipid biosynthesis genes. *J*  
21 *Bacteriol.* 1997;179: 5756-5767. doi:10.1128/jb.179.18.5756-5767.1997  
22 PMID:9294432
- 23 **43.** Pearson JP, Gray KM, Passador L, Tucker KD, Eberhard A, Iglewski BH, et al.  
24 Structure of the autoinducer required for expression of *Pseudomonas aeruginosa*  
25 virulence genes. *Proc Natl Acad Sci U S A.* 1994;91: 197-201.  
26 doi:10.1073/pnas.91.1.197 PMID:8278364

- 1   **44.** Steindler L, Venturi V. Detection of quorum-sensing N-acyl homoserine lactone signal  
2       molecules by bacterial biosensors. *FEMS Microbiol Lett.* 2007;266: 1-9.  
3       doi:10.1111/j.1574-6968.2006.00501.x PMID:17233715
- 4   **45.** Gentleman RC, Carey VJ, Bates DM, Bolstad B, Dettling M, Dudoit S, et al.  
5       Bioconductor: open software development for computational biology and bioinformatics.  
6       *Genome Biol.* 2004;5: R80. doi:10.1186/gb-2004-5-10-r80 PMID:15461798
- 7   **46.** Lee K, Lee KM, Go J, Ryu JC, Ryu JH, Yoon SS. The ferrichrome receptor A as a new  
8       target for *Pseudomonas aeruginosa* virulence attenuation. *FEMS Microbiol Lett.*  
9       2016;363: fnw104. doi:10.1093/femsle/fnw104 PMID:27190289
- 10   **47.** Filloux A, Ramos JL. Preface. *Pseudomonas methods and protocols. Methods Mol Biol.*  
11       2014;1149: v. doi:10.1007/978-1-4939-0473-0 PMID:24936603

12  
13

## 1 **Figure legends**

2 **Fig 1. Effect of Dkstatin candidate compounds on *P. aeruginosa*. (A) and (B)** Chemical  
3 structure of Dkstatin-1 (DKST-1) and Dkstatin-2 (DKST-2). **(C)** Relative formazan production  
4 of PAO1 and  $\Delta dksA1$  mutant grown in LB with 150  $\mu$ M Dkstatin-1 and Dkstatin-2 for 8 hours.  
5 The values of mean  $\pm$  S.D. are presented (n=3). **(D)** Relative *rpsB* expression of PAO1  
6  $P_{rpsB}::lacZ$  and  $\Delta dksA1 P_{rpsB}::lacZ$  strains incubated in LB with 150  $\mu$ M Dkstatin-1 and  
7 Dkstatin-2 for 8 hours. The *rpsB* gene expression is represented as  $\beta$ -galactosidase activity.  
8 The values of mean  $\pm$  S.D. are presented (n=3).

9 **Fig 2. Effects of Dkstatin-1 and Dkstatin-2 on bacterial growth and virulence. (A)**  
10 Growth curves of PAO1 and  $\Delta dksA1$  mutant in plain LB and LB supplemented with 150  $\mu$ M  
11 of Dkstatin-1 (DKST-1) or Dkstatin-2 (DKST-2). Aliquots of bacterial cultures (n=3) were  
12 withdrawn every hour to measure OD<sub>600</sub> values. **(B)** Cell viability of PAO1 incubated with  
13 Dkstatin-1 (DKST-1) and Dkstatin-2 (DKST-2). **(C)** Relative elastase activity of tested strains.  
14 Elastase activity was measured as described in the Methods and was normalized with that of  
15 PAO1. The values of mean  $\pm$  S.D. are presented (n=5). **(D)** Pyocyanin production in each  
16 condition was quantified and normalized with that of PAO1. The values of mean  $\pm$  S.D. are  
17 presented (n=3). **(E)** Visual comparison of bacterial culture supernatants. Loss of pigment  
18 was clearly observed in PAO1 and both Dkstatin compounds.

19 **Fig 3. Measurement of 3-oxo-C12-HSL and C4-HSL produced when supplemented with**  
20 **Dkstatin compounds. (A)** Relative levels of 3-oxo-C12-HSL (C12-HSL) were measured  
21 using an *E. coli* reporter strain harboring a pKDT17 plasmid. Concentrations of C12-HSL are  
22 represented as  $\beta$ -galactosidase activity. The values of mean  $\pm$  S.D. are presented (n=5). **(B)**  
23 Relative levels of *N*-butyryl-homoserine lactone (C4-HSL) were monitored by measuring the  
24 violacein production from the biosensor strain *C. violaceum* CV026. Violacein production

1 was measured at 590 nm absorbance and was normalized to the OD<sub>600</sub> values of CV026.  
2 150  $\mu$ M Dkstain-1 (DKST-1) and Dkstatin-2 (DKST-2) were supplemented in all experiments.

3 **Fig 4. Effects of Dkstatin-1 and Dkstatin-2 on anaerobic respiration. (A)** Growth curves  
4 of PAO1 and  $\Delta dksA1$  mutant in LB and LB supplemented with 150  $\mu$ M Dkstain-1 (DKST-1)  
5 and Dkstatin-2 (DKST-2). 25 mM NO<sup>3-</sup> was added as an alternative electron receptor. OD  
6 values of bacterial culture aliquots (n=2) were measured every 2 hours. **(B)** The cell viability  
7 of anaerobically grown  $\Delta dksA1$  mutant and PAO1 incubated with 150  $\mu$ M Dkstain-1 and  
8 Dkstatin-2. Bacterial cultures grown anaerobically for 24 hours in LB supplemented with 25  
9 mM NO<sup>3-</sup> were serially diluted. 10  $\mu$ l of each diluent was spot inoculated on an LB agar plate.  
10 The plates were incubated in anaerobic conditions at 37°C for 24 hours.

11 **Fig 5. Effects of Dkstatin-1 and Dkstatin-2 on antibiotic susceptibility.** CFU counting of  
12 PAO1 incubated with Dkstatin-1 (DKST-1) and Dkstatin-2 (DKST-2) when supplemented with  
13 antibiotics; **(A)** 2.5  $\mu$ g/ml of imipenem, **(B)** 2.5  $\mu$ g/ml of gentamicin **(C)** 8  $\mu$ g/ml of tetracycline,  
14 **(D)** 25  $\mu$ g/ml of kanamycin, **(E)** 12.5  $\mu$ g/ml of streptomycin, and **(F)** 1  $\mu$ g/ml of tobramycin.

15 **Fig 6. Intracellular production of DksA1 in response to Dkstatin treatment and effects**  
16 **of Dkstatin treatment on binding of DksA1 with RNA polymerase  $\beta$  subunit. (A)** Original  
17 strain of PAO1 (first lane) and PAO1 harboring a *dksA1::FLAG* translational fusion construct  
18 (following lane) were grown in LB in the presence of either 150  $\mu$ M Dkstatin-1 (DKST-1) or  
19 Dkstatin-2 (DKST-2) for 8 hours. Intracellular fractions were subjected to western blot with an  
20 anti-FLAG antibody. As a control, strains were treated with equal volumes of DMSO (Con).  
21 Samples at equal protein concentrations were loaded into 12% SDS-PAGE gel. **(B)** A PAO1  
22 strain with *dksA1::FLAG* translational fusion construct was grown for 8 hours in the presence  
23 of 150  $\mu$ M Dkstatin-1 (DKST-1), Dkstatin-2 (DKST-2) or an equal volume of DMSO (Con).  
24 Each intracellular extract was incubated with an equal volume of magnetic beads conjugated

1 with an anti-FLAG antibody and were precipitated. Resuspended precipitates were loaded  
2 onto SDS-PAGE gel for western blot with the anti-FLAG antibody and the anti-RpoB antibody.

3 **Fig 7. Comparison of effects of Dkstatin-1 and Dkstatin-2 on gene expression. (A)**

4 Venn diagram for number of genes affected by Dkstatin-1 (DKST-1) or Dkstatin-2 (DKST-2)  
5 treatment. Expression fold range was separated as 2 to 4-fold and over 4-fold. **(B)**  
6 Expression of 50S and 30S ribosomal protein encoding genes. Dkstatin-2 (DKST-2) was  
7 more effective to increase expression of those genes. **(C)** Expression of genes participated  
8 in three major QS circuits was downregulated in the presence of both Dkstatin-1 and  
9 Dkstatin-2. **(D)** Transcription of genes for virulence factors. Phenazine biosynthesis clusters  
10 (*phzA1~G1* and *phzA2~G2*) were remarkably down-regulated for either Dkstatin. **(E)**  
11 Expression of genes involved in all steps of denitrification. Gene clusters (*nirSMCFLGHJND*  
12 and *norCBD*) encoding nitrite reductase (NIR) and nitric oxide reductase (NOR) were  
13 invariably down-regulated in both Dkstatin-1 and Dkstatin-2. **(F)** Expression of genes  
14 categorized as electro transfer. The two *cbb3*-type cytochrome c oxidase encoding gene set  
15 (*ccoN1~P1* and *ccoN2~P2*) was up-regulated by Dkstatin-2. **(G)** Expression of ATP synthase  
16 complex encoding gene operon. All total RNA were harvested as biological duplicates.

17 **Fig 8. *in vivo* virulence analyses of Dkstatin-1 and Dkstatin-2. (A)** Survival curves of

18 mice infected with PAO1 (green line) and PAO1 combined with Dkstatin-1 (red line) or  
19 Dkstatin-2 (orange line). The infection dose was  $\sim 10^6$  cells per mouse. \*,  $p < 0.05$  vs.  
20 survival rate of PAO1-infected mice. Four mice were used in each group. **(B)** Bacterial CFU  
21 values counted from whole dissected lungs. The initial dose was  $3 \times 10^6$  cells per mouse of  
22 PAO1 or PAO1 combined with 150  $\mu$ M of Dkstatin-1 or Dkstatin-2. \*,  $p < 0.05$  vs. CFU of the  
23 PAO1-infected mice. **(C)** H&E stained histological visualizations of lung tissues from mice  
24 intranasally administrated DMSO only, **(D)** 150  $\mu$ M of Dkstatin-1 and **(E)** Dkstatin-2. **(F)** H&E  
25 stained lung tissues of mice infected with PAO1 combined with DMSO, **(G)** PAO1 combined

1 with 150  $\mu$ M of Dkstatin-1 and **(H)** Dkstatin-2.

## 1 **Supplementary figure legends**

2 **S1 Fig. Screening scheme for Dkstatin compound. (A)** Visual comparison of formazan  
3 production. Reduction of formazan production in  $\Delta dksA1$  mutant was observed. **(B)**  
4 Demonstration of screening procedure for Dkstatin compound. In the first step, the OD600  
5 value of *P. aeruginosa* incubated in LB for 4 hours was adjusted to 1.0, and it was inoculated  
6 into chemical library plates. 15  $\mu$ l of chemical compounds in stock chemical libraries were  
7 distributed into new plates to at a concentration of 50  $\mu$ M. Exposure of chemical compound  
8 to PAO1 was performed for 2 hours at 37°C. 15  $\mu$ l of 0.5 mg/ml thiazolyl blue tetrazolium  
9 bromide was inoculated into test plates to observe (purple colored) formazan production. In  
10 the second step in the screening, *rpsB* expression (represented as  $\beta$ -galactosidase activity)  
11 and elastase activity were measured to select further potent chemical candidates.

12 **S2 Fig. Measurements of relative elastase activity and *rpsB* expression under four**  
13 **Dkstatin candidates (A)** Comparisons of relative elastase activity and *rpsB* expression from  
14 PAO1 *PrpsB::lacZ* and PAO1 $\Delta dksA1$  *PrpsB::lacZ* strains incubated for 4 hours in LB.  
15 Relative levels of *rpsB* expression were represented as  $\beta$ -galactosidase activity. 50  $\mu$ M of 4  
16 Dkstatin candidate compounds (labeled as 55B05, 02G09, 86B09 and 45G08) were  
17 supplemented in LB. The values of mean  $\pm$  S.D. are presented (n=2). **(B)** Relative levels of  
18 elastase activity and *rpsB* expression of *PrpsB::lacZ* and PAO1 $\Delta dksA1$  *PrpsB::lacZ* strains  
19 incubated for 8 hours in LB. Relative levels of *rpsB* expression were represented as  $\beta$ -  
20 galactosidase activity. 50  $\mu$ M of 4 Dkstatin candidate compounds were supplemented in LB.  
21 The values of mean  $\pm$  S.D. are presented (n=2).

22 **S3 Fig. HSL-autoinducer complementation under Dkstatin-1 and Dkstatin-2**  
23 **supplemented condition.** Demonstration of combined HSL-autoinducer (C4/C12-HSL)  
24 complementation experiment procedure (Upper). 200  $\mu$ M of C4/C12-HSL complementation



1 in PAO1 and  $\Delta dksA1$  mutant was conducted for 8 hours in LB medium with supplementation  
2 of 150  $\mu\text{M}$  of Dkstatin-1 or Dkstatin-2. Elastase activities of PAO1 and  $\Delta dksA1$  mutant were  
3 measured at each time point after addition of C4/C12-HSL (4, 6, and 8 hours). Elastase  
4 production in PAO1 treated with 150  $\mu\text{M}$  of Dkstatin-1 ( $\circ$ , blue line) and Dkstatin-2 ( $\circ$ , orange  
5 line) was constantly less than 50% that produced in the control ( $\bullet$ , black line). With C4/C12-  
6 HSL complementation, the elastase productions with 150  $\mu\text{M}$  of Dkstatin-1 ( $\bullet$ , red line) and  
7 Dkstatin-2 ( $\bullet$ , green line) were restored in 4 hours and completely diminished 8 hours post  
8 complementation. C4/C12-HSL complementation was not effective in elastase production in  
9  $\Delta dksA1$  mutant ( $\blacksquare$ , black line and  $\square$ , black line).

10 **S4 Fig. Transcriptome analysis produced in PAO1 and PAO1 treated with Dkstatin-1 or**  
11 **Dkstatin-2. (A)** Transcriptome heat-map produced from biologically duplicated RPKM values  
12 of PAO1 and Dkstatin-1 or -2 treated PAO1. DMSO was used as a solvent control for  
13 Dkstatin-1 and Dkstatin-2 treatment. The Z-score ranged from -1.0 to 1.0 and is represented  
14 as a color coded index. **(B)** PCA plot representing the similarity of transcripts in PAO1  
15 treated with DMSO (#1 and #2) and with Dkstatin-1 (#5 and #6) or Dkstatin-2 (#3 and #4).  
16 Each similarity was significantly distinguishable. Total transcripts were harvested as  
17 biological duplicates.

18 **S5 Fig. Categorization of differentially expressed genes based on gene ontology (GO)**  
19 **terms. (A)** GO terms in Dkstatin-1 treated group. Most genes included in GO terms (such as  
20 phenazines biosynthesis process, pathogenesis, secretion and chemotaxis) were down-  
21 regulated by Dkstatin-1 treatment. **(B)** Presented GO terms in Dkstatin-2 treated group. 11  
22 GO terms were retrieved in the Dkstatin-2 treated group. Genes participating in GO terms  
23 such as translation, ribosomal assembly and energy metabolism were up-regulated by  
24 Dkstatin-2 treatment.

- 1 **S1 Table. Bacterial strains and genetic materials used in this study.**
- 2 **S2 Table. Primer sequences used in this work.**
- 3

A

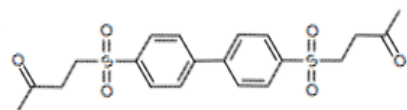

Dkstatin-1 (55B05)  
4,4'-(4,4'-biphenyldiyl)disulfonyldi(2-butanone)

B

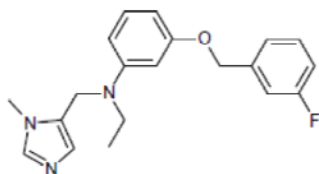

Dkstatin-2 (86B09)  
N-ethyl-3-[(3-fluorophenyl)methoxy]-N-[(1-methyl-1H-imidazol-5-yl)methyl]aniline

C

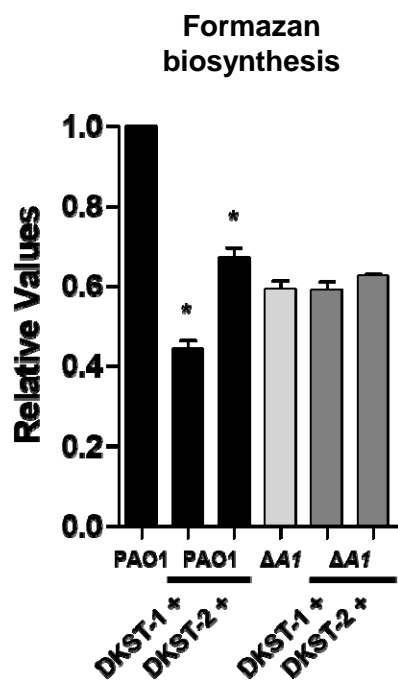

D

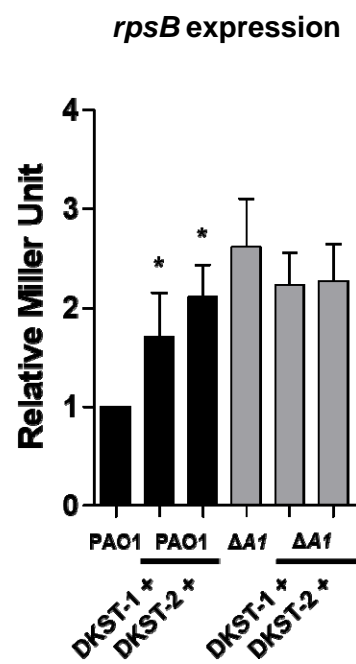

**A**

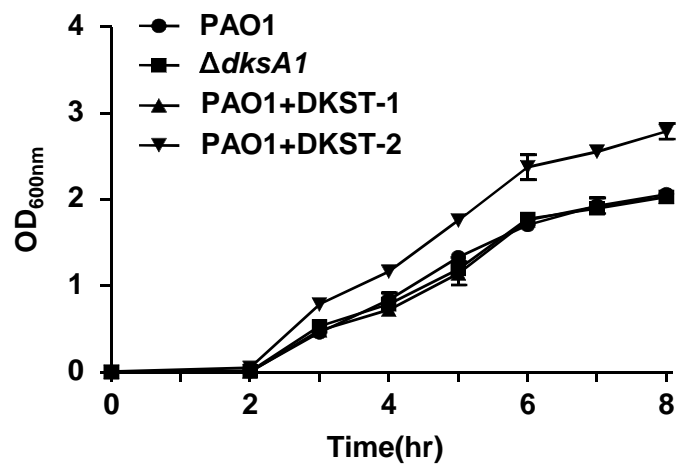

**B**

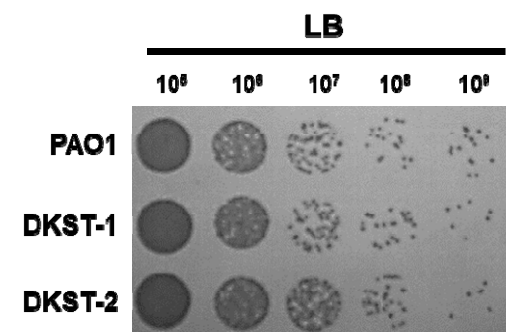

**C**

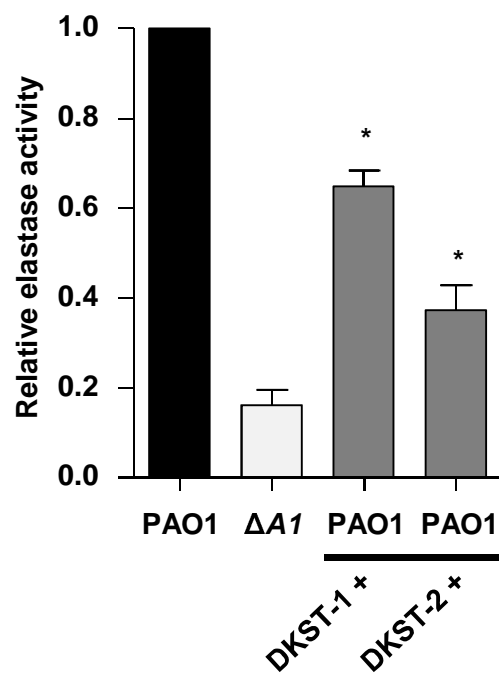

**D**

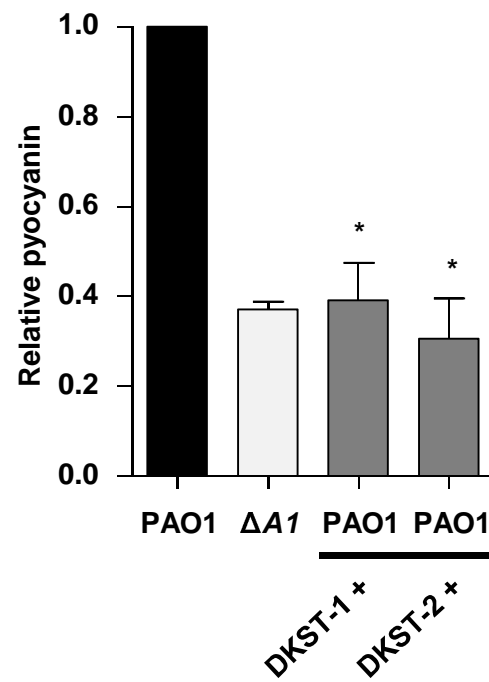

**E**

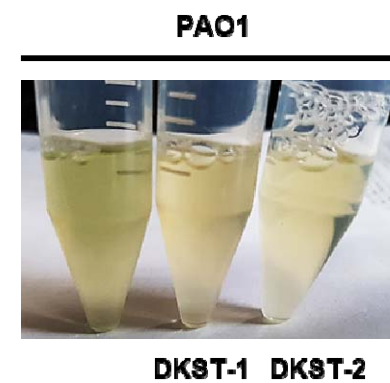

A

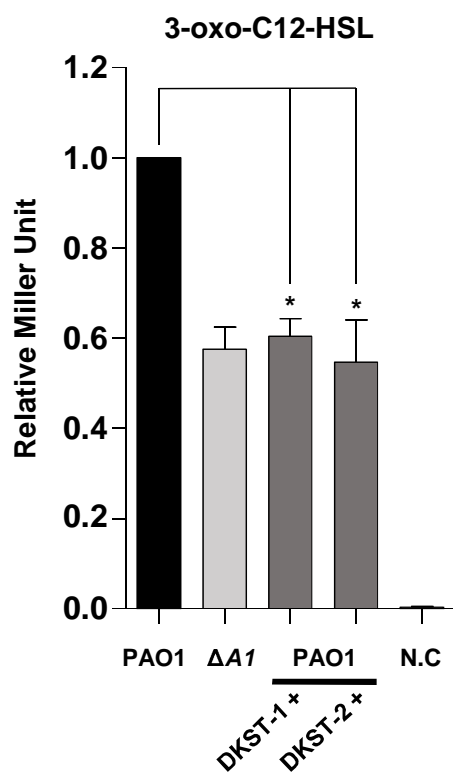

B

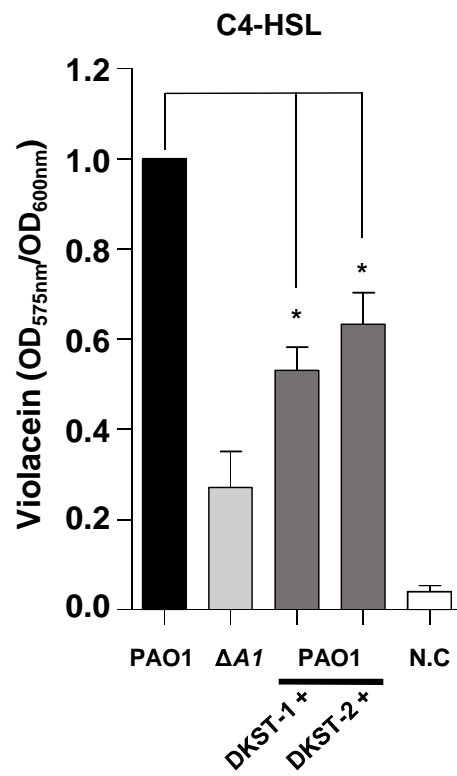

A

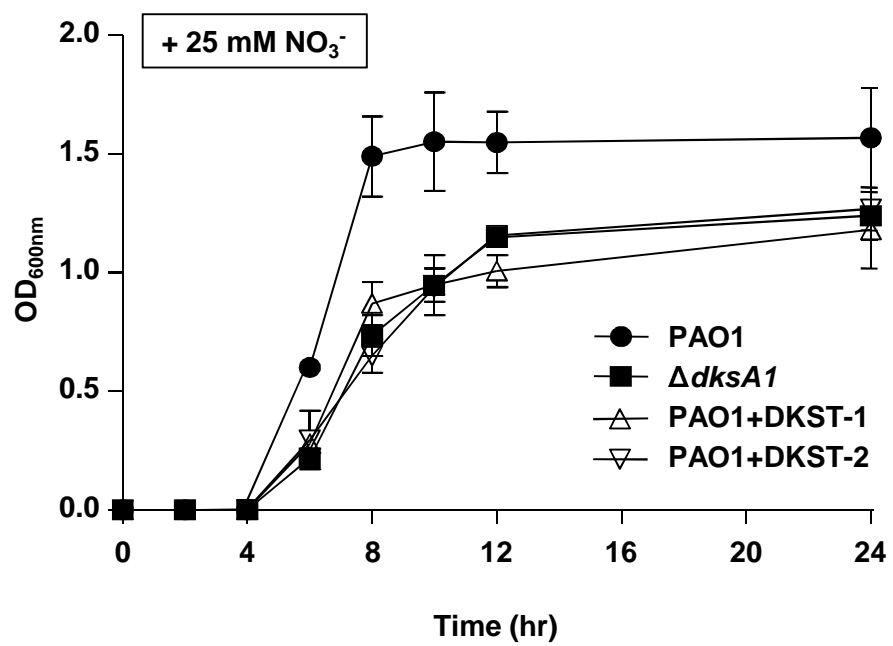

B

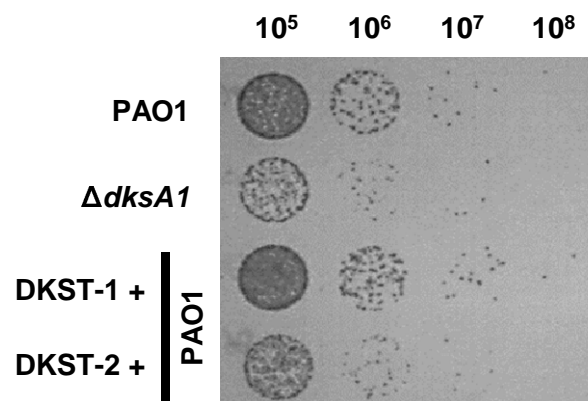

**A**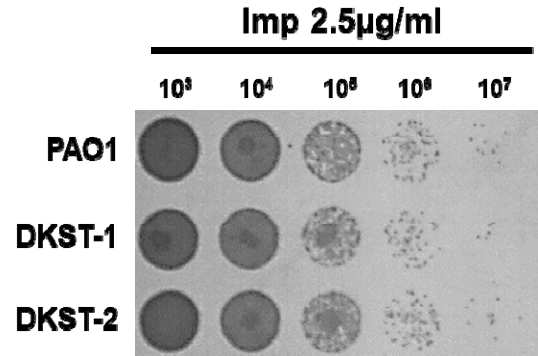**B**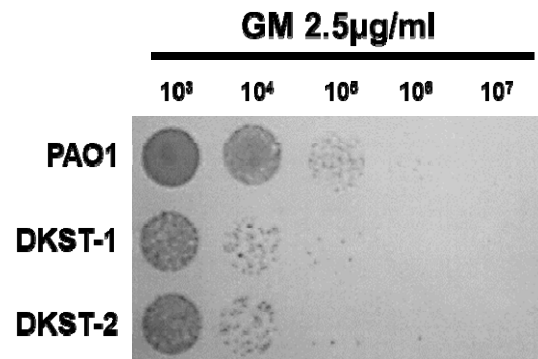**C**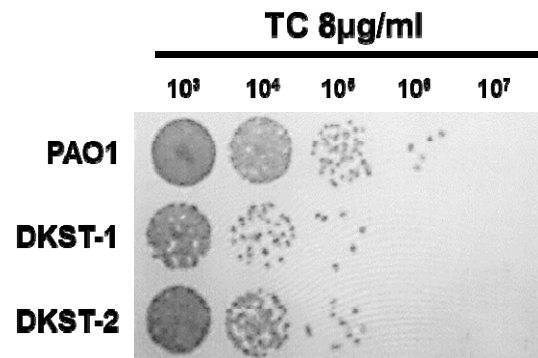**D**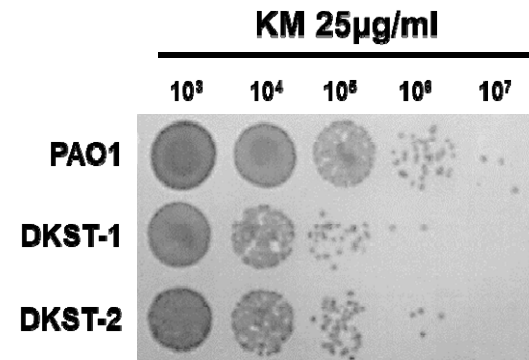**E**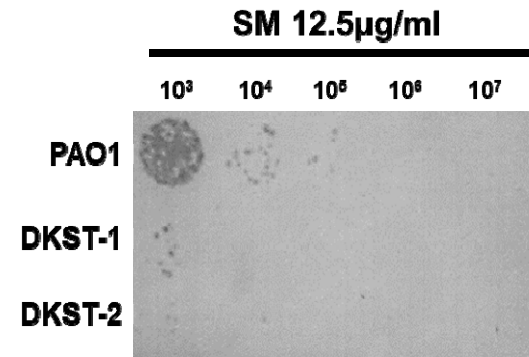**F**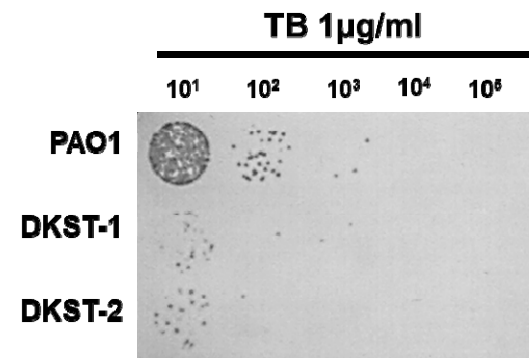

**A**

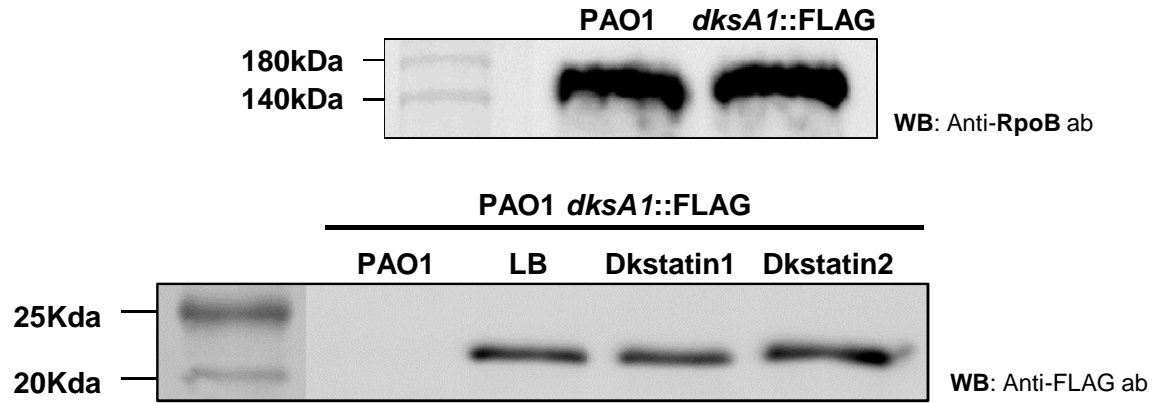

**B**

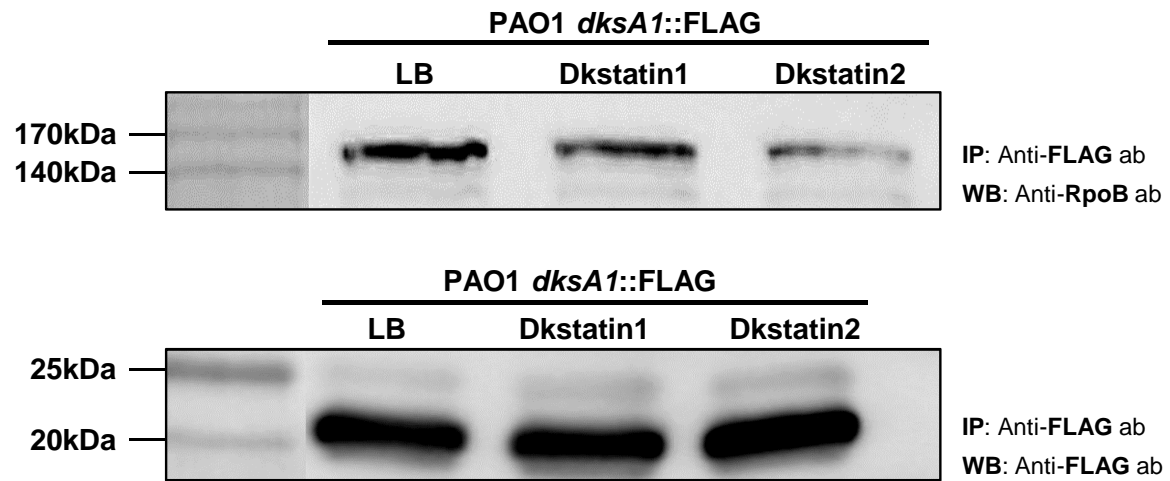



**-regulated < 4-fold**

**2-fold < Down-regulated < 4-fold**

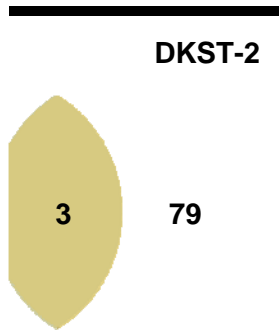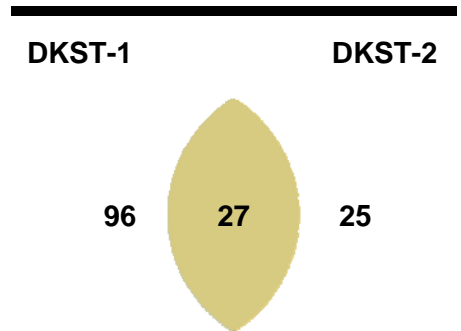

**: Up-regulated**

**4-fold < Down-regulated**

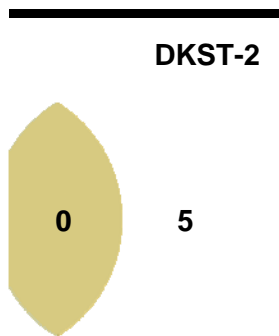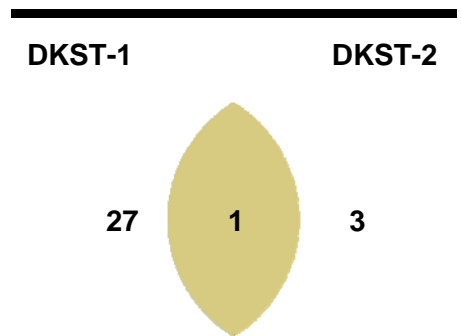

**B**

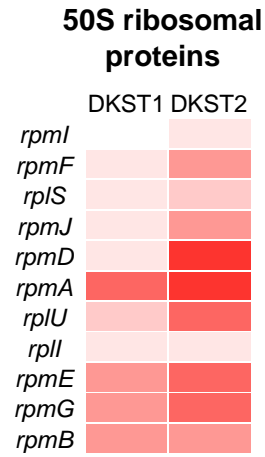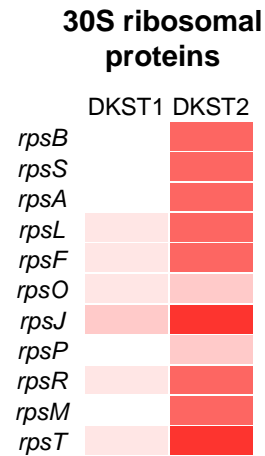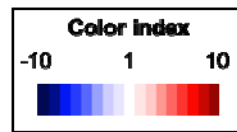

**C**

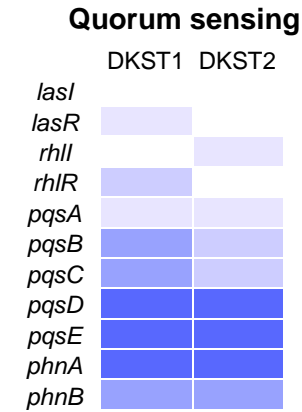

**F**

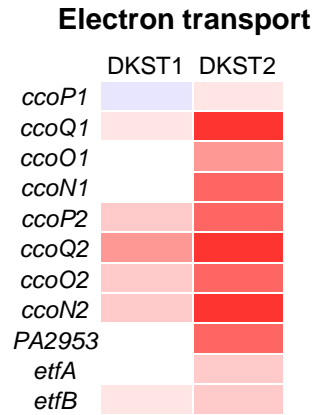

**G**

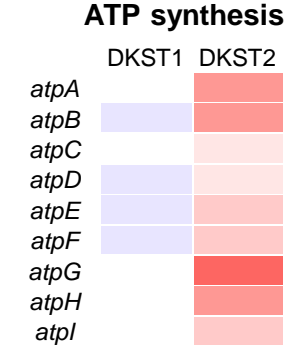

**D**

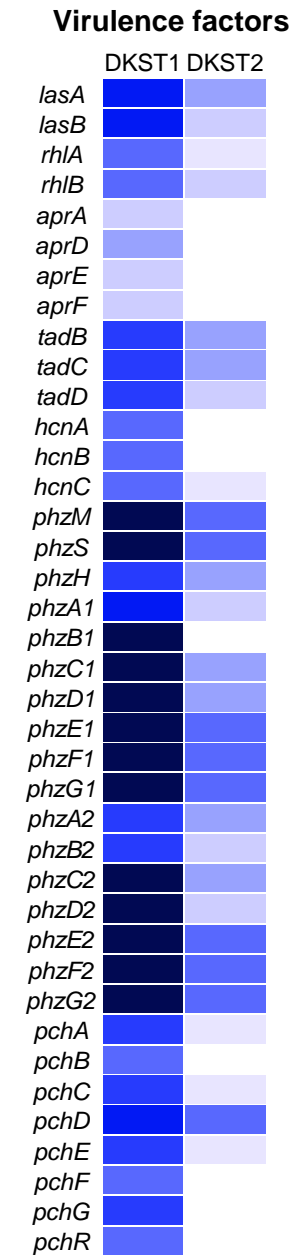

**E**

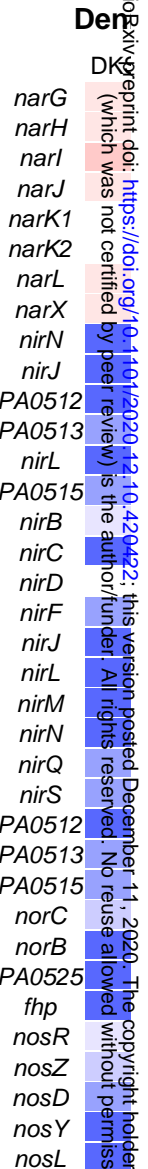

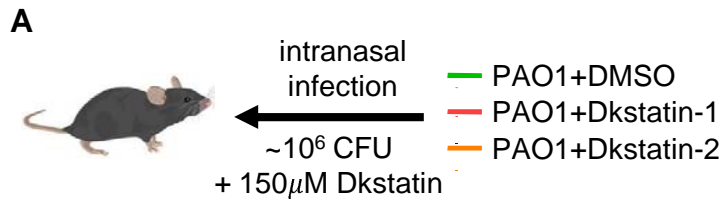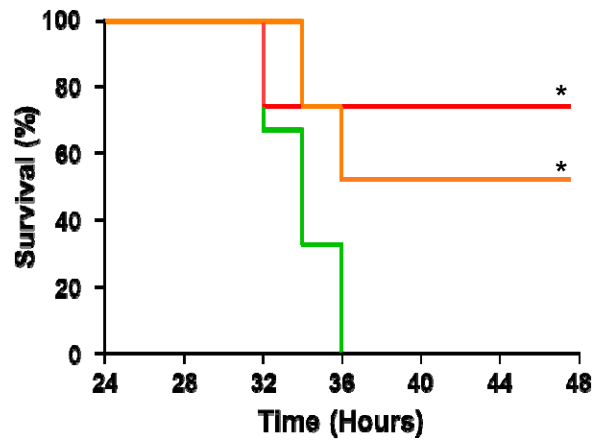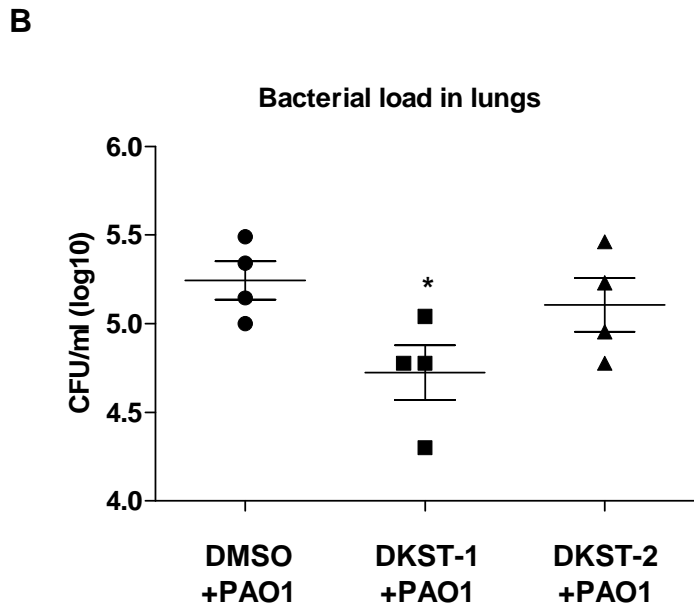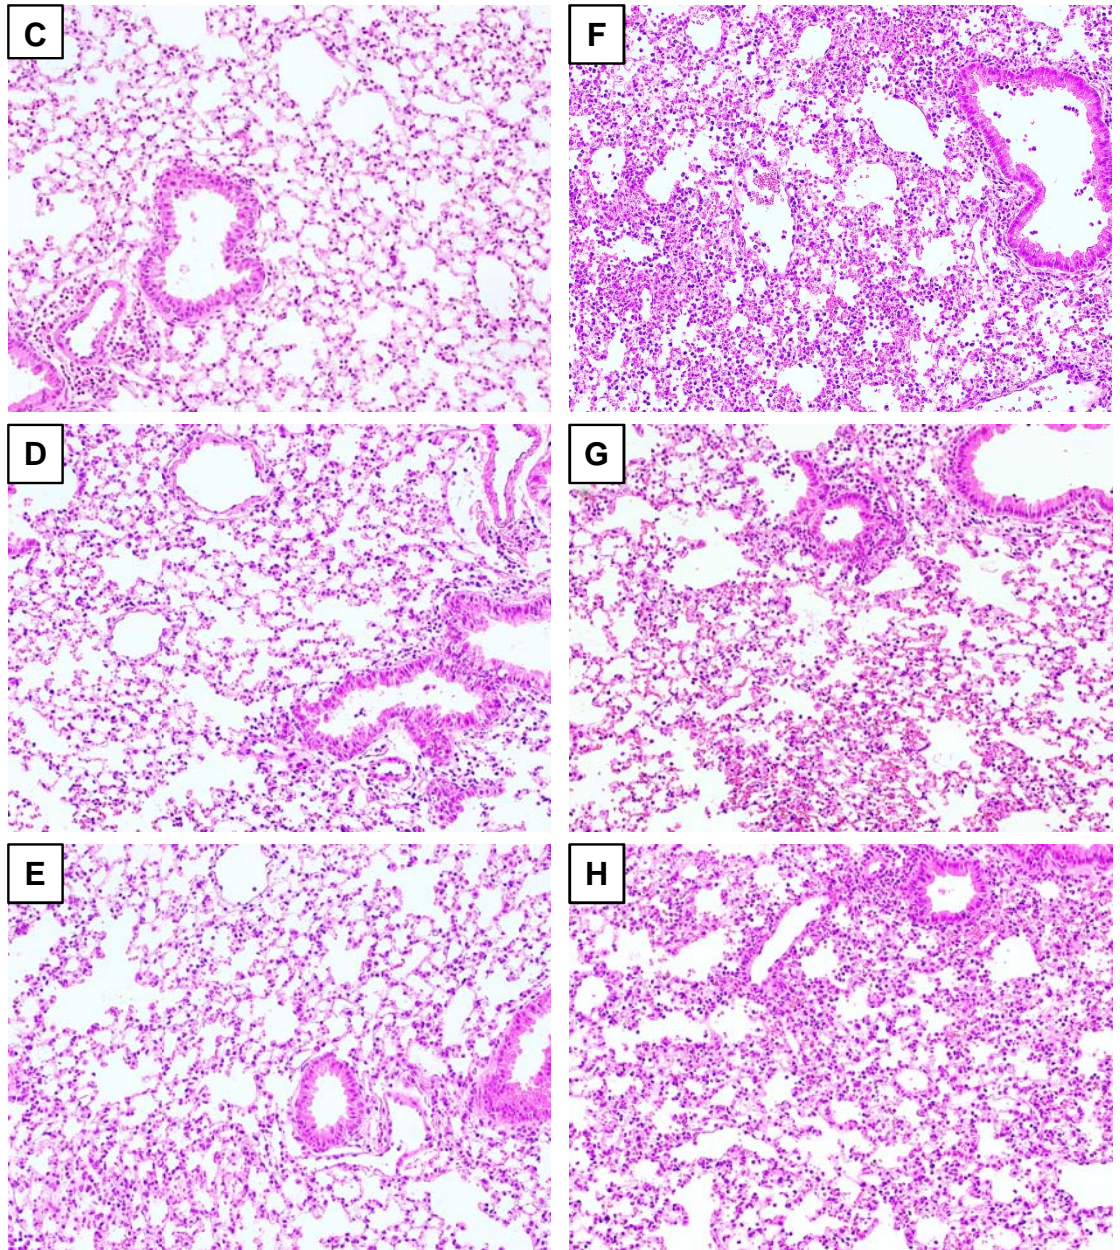

Source: https://www.biorxiv.org/content/10.1101/2020.12.10.420422v1.full.pdf
